# Supplementary material for: Structural and energetic characterization of the major DNA adduct formed from the food mutagen ochratoxin A in the NarI hotspot sequence: influence of adduct ionization on the conformational preferences and implications for the NER propensity
Source: PubMed Central journal article supplement — Nucleic Acids Res. 2014 Sep 12;42(18):11831–45. doi: 10.1093/nar/gku821 (PMC4191402; doi:10.1093/nar/gku821), 2014-09-12
Supplement: supp_gku821_nar-02006-f-2014-File002.pdf [file supp_gku821_nar-02006-f-2014-File002.pdf]

# Structural and Energetic Characterization of the Major DNA Adduct Formed from the Food Mutagen Ochratoxin A in the *NarI* Hotspot Sequence: Influence of Adduct Ionization on the Conformational Preferences and Implications for the NER Propensity

Purshotam Sharma<sup>1</sup>, Richard A. Manderville<sup>2</sup> and Stacey D. Wetmore<sup>1,\*</sup>

<sup>1</sup>Department of Chemistry and Biochemistry, University of Lethbridge, Lethbridge, Alberta, Canada, T1K 3M4 and <sup>2</sup>Department of Chemistry and Toxicology, University of Guelph, Guelph, Ontario, Canada, N1G 2W1

\*To whom correspondence should be addressed. Tel. +1 403 329-2323; Fax: +1 403 329-2057; Email: stacey.wetmore@uleth.ca

## SUPPLEMENTARY MATERIALS AND METHODS

**Starting Structures.** Molecular dynamics (MD) simulations were carried out with the neutral, monoanionic or dianionic form of the OTB-dG adduct at the G<sup>1</sup>, G<sup>2</sup> or G<sup>3</sup> position in the *NarI* sequence and paired against complementary cytosine. Initial structures for three (major groove, (minor groove) wedge and base-displaced intercalated (stacked)) conformations were built from the natural *NarI* DNA helix using the NAB module of AMBER 11 [1] and adding the C8-moiety to the guanine residue under consideration using GaussView (Version 5). The starting adduct orientation for the major-groove conformation was built by placing the adduct in the *anti* conformation, and allowing the lesion to form Watson-Crick hydrogen bonds with the opposing C. On the other hand, the wedge conformation was built by orienting the adduct in the *syn* conformation and permitting Hoogsteen hydrogen bonding with C. The starting structure for the base-displaced intercalated (stacked) conformation was built by displacing the opposing cytosine out of the helix and using the *syn* orientation of the adduct, while allowing intercalation of the C8-moiety. Two OTA rotamers ( $\alpha$  and  $\beta$ , Figure S1) were considered that are defined along the axis passing through the two fused rings of the OTA isocoumarin moiety, are governed by the dihedral angle  $\theta$ , and are related by an approximate 180° flip along the  $\theta$  torsion angle ( $\angle(N9C8C1C2)$ , Figure 1). Both rotamers were used to model each conformation. In addition, simulations were carried out using a number of different trial structures corresponding to the  $\alpha$  and  $\beta$  rotamers for the *syn* (wedge and base-displaced intercalated) conformations in order to search for the lowest energy structures that retain optimal characteristics of the base-displaced intercalated and wedge conformations. Since our main goal is to understand the conformational preferences of OTB-dG at each of the G<sup>1</sup>, G<sup>2</sup> and G<sup>3</sup> positions, an additional filter that retains Watson-Crick hydrogen bonding at the terminal base pairs of the 12-mer helix was applied to ensure the viability of the simulated structures for the free energy calculations. This technicality was necessary since destabilizing perturbations at the ends of the helix may alter the overall free energy of the simulated

helix, which makes it difficult to isolate the effect of the adduct conformation on the helix stability. The retention of the terminal base pairs was confirmed by monitoring the corresponding Watson-Crick hydrogen bonds (Table S7).

**Force Field.** The parameters for the bonded terms in the force field for simulating the natural nucleotides were taken from the parmbsc0 modification to the parm99 force field, and additional parameters for the modified residues were assigned based on the generalized AMBER force field (GAFF) [2]. The RED.v.III.4 [3] program was used to calculate the partial charges for building the force field libraries of ionized OTA, while the partial charges for neutral OTA were taken from a previous study [4]. A two-stage RESP fitting procedure was carried out on B3LYP/6-31G(d) optimized structures using Hartree-Fock single-point calculation with the 6-31G(d) basis set and the Gaussian 03-interfaced RED program. Antechamber 1.4 [5] was then used to assign atom types. The partial charges and atom types for the modified residues are given in Tables S8-S10.

**MD Protocol.** Simulations were carried out using PMEMD of the AMBER 11 [1] or 12 [6] software package. Each simulated DNA duplex was first neutralized with 22 sodium ions and solvated in an 8 Å truncated octahedral TIP3P [7] box of water molecules using the LEAP module of AMBER 11[1]. The particle mesh Ewald (PME) method was used to model the long-range Coulombic interactions, and a 10 Å cutoff was applied to the Lennard-Jones interactions. The bonds involving hydrogen atoms were constrained using the SHAKE algorithm. A 2 fs time step was used. Initial minimization was carried out using 500 steps of steepest descent (SD) and 500 steps of conjugate gradient (CG) optimization, where the solute was held fixed using a force constant of 500 kcal mol<sup>-1</sup> Å<sup>-2</sup>. The entire system was then relaxed using 1000 and 1500 steps of SD and CG minimization, respectively. Next, the system was heated from 0 to 300 K using the Langevin thermostat for 20 ps under constant volume conditions. Finally, unrestrained production simulations were carried out at constant temperature (300 K) and pressure (1 atm) for 40 nanoseconds (ns).

**Free Energy Analysis.** Free energy analysis was carried out on snapshots from MD trajectories with the water and counterions removed using the MM-PBSA [8] method as implemented in AMBER 11 [1] or 12 [6]. A total of 1000 snapshots at 20 ps intervals were used to calculate the binding free energy ( $E_{MM}$ ) and the implicit solvation free energy ( $E_{sol}$ ) terms, while 100 snapshots at 200 ps intervals were used across the entire 40 ns trajectory to calculate the vibrational entropy contributions using the normal-mode analysis.

The total free energy ( $G_{Tot}$ ) was calculated as

$$G_{Tot} = E_{MM} + E_{sol} - TS$$

Within this formulism, the  $E_{MM}$  term was calculated as the sum of an internal energy term ( $E_{int}$ ), which consists of deviations in bonds ( $E_{bonds}$ ), angles ( $E_{angles}$ ) and dihedral angles ( $E_{dihedrals}$ ) from their equilibrium values, the van der Waals interaction energies ( $E_{vdW}$ ) and the electrostatic energies ( $E_{elec}$ ).

$$E_{\text{MM}} = E_{\text{int}} + E_{\text{vdW}} + E_{\text{elec}}$$

$$E_{\text{int}} = E_{\text{bonds}} + E_{\text{angles}} + E_{\text{dihedrals}}$$

The  $E_{\text{sol}}$  term was calculated as the sum of the polar and nonpolar contributions. The polar contribution stemming from the electrostatic solvation free energies was calculated using the Poisson Boltzmann (PB) model. The nonpolar contributions were calculated based on the solvent accessible surface area, which was evaluated using Sanner's algorithm.

**RMSD.** The root mean square deviation (RMSD) of the atoms forming the sugar–phosphate backbone was used to evaluate the stabilities of each simulation. The RMSD of each snapshot in the trajectory was evaluated relative to the first frame, and plotted as a function of time (Figures S7-S9). The mean and standard deviations in the RMSD are given in Table S11, where the fluctuations around the mean range from 0.348 to 0.787 Å. Thus, the entire 40 ns structural ensemble was used for the free energy calculations and further structural analyses.

**Representative Structures.** Representative structures were obtained by clustering each MD simulation with respect to the  $\chi$  and  $\theta$  dihedral angles of the OTB-dG residue using the refinement (K-means) clustering algorithm as implemented in the cpptraj module of Ambertools. The means clustering algorithm chooses a collection of maximally distant seed points, each of which are assigned to a cluster. This procedure is then iterated over all data points. Each data point is then assigned to the cluster with the closest centroid. The centroid of the cluster is then recomputed, which assigns the frames from the trajectory into a cluster, and identifies the representative structure. All representative structures are provided in Figures S1–S6.

**Hydrogen-Bond Occupancies.** The hydrogen-bond occupancies were calculated for the trimeric portion of each simulated helix, which includes the adducted base pair and the corresponding 3'- and 5'-neighboring pairs, using the ptraj module of Ambertools. The occupancies were calculated using a donor–acceptor cutoff distance of 3.40 Å and a donor–hydrogen acceptor cutoff angle of 120°. All hydrogen bonds in the trimeric portions, along with their occupancies, are listed in Tables S4–S6. The corresponding occupancies for the unmodified control sequence at the analogous positions are provided for comparison. The hydrogen-bond occupancies for other interactions, such as those between terminal pairs or between the adducted pair and the flanking residues, were also calculated using the same donor–acceptor and angle cutoffs.

**Dihedral Angle Calculation.** The  $\chi$  and  $\theta$  dihedral angles in the OTB-dG adduct were calculated using the 'dihedral' command internally stored in the ptraj module of Ambertools. The probability distribution of  $\chi$  and  $\theta$  over the simulation was calculated, and the associated radar plots generated using Microsoft Excel (Figures S10–S12). In the radar plots, the values of the torsion angles are plotted on the circumference, with the probability plotted on the radius of the circle.

**Sugar Pucker Analysis.** The pseudorotational phase angle for the 2'-deoxyribose sugar of the OTB-dG nucleotide was calculated using the 'pucker' command of the cpptraj module of

Ambertools. The pseudorotational angle of the corresponding nucleotide in the natural *NarI* sequence was also determined using the same procedure. The radar plots for the probability distribution of the sugar pucker were generated using Microsoft Excel (Figures S13–S16).

**Hydrogen-bonding Interaction Energies.** The hydrogen-bonding interaction energies between the OTB-dG adduct and the opposing cytosine in the major groove and the wedge DNA conformations were calculated using the ‘lie’ command of cpptraj. For these calculations, the sugar atoms were excluded, and only the electrostatic energies were used to estimate the hydrogen-bonding strengths since the Lennard-Jones nonbonded interaction energies were small for these subsystems (Tables S1-S3).

**Stacking interaction energies.** For the major groove and wedge conformations, the stacking energies between the adducted base pair and the flanking base pairs were estimated from the Lennard-Jones energies calculated using the lie command of ptraj. However, for the base-displaced intercalated conformations, only the adducted nucleobase moiety was used for the stacking calculations since the opposing cytosine was displaced out of the helix. The sugar atoms were excluded when calculating the stacking energies (Tables S1-S3).

**Base step parameters.** The base step parameters were calculated using a pseudostep consisting of the base pairs adjacent and 5' or 3' with respect to the lesion. These parameters were compared with the corresponding natural parameters to understand the effect of the damage on the structural properties of DNA. The base step parameters were calculated using the ‘nastruct’ command of cpptraj. The mean values of the base step parameters from each of the 80000 frames of the 40 ns simulation trajectory were used to estimate the difference between these structural parameters in the modified and natural helices (Tables S1-S3).

**Minor groove width.** The minor groove widths of the DNA duplexes at the lesion site were calculated using cpptraj. The corresponding values were also determined for the unmodified control sequences. The pairs of phosphate atoms used to calculate the minor groove widths at the lesion site for the natural and modified duplexes are given in the footnotes of Tables S1-S3.

**Table S1.** Salient structural and energetic features of the major groove conformations of OTB-dG adducted DNA in the neutral, monoanionic or dianionic OTA ionization state at the G<sup>1</sup>, G<sup>2</sup> or G<sup>3</sup> position in the *NarI* recognition sequence.

| position       | OTB-dG form    | rotamer | $\Delta E_{\text{Hbond}}$<br>(kcal mol <sup>-1</sup> ) <sup>a,b</sup> | $\Delta E_{\text{vdW}}$<br>(kcal mol <sup>-1</sup> ) <sup>a,c</sup> | shift<br>(Å) <sup>a,d</sup> | slide<br>(Å) <sup>a,d</sup> | rise<br>(Å) <sup>a,d</sup> | tilt<br>(deg.) <sup>a,d</sup> | roll<br>(deg.) <sup>a,d</sup> | twist<br>(deg.) <sup>c,d</sup> | minor groove width (Å) <sup>a,e</sup> |
|----------------|----------------|---------|-----------------------------------------------------------------------|---------------------------------------------------------------------|-----------------------------|-----------------------------|----------------------------|-------------------------------|-------------------------------|--------------------------------|---------------------------------------|
| G <sup>1</sup> | control        | –       | –29.0                                                                 | –30.2                                                               | 0.1                         | –0.9                        | 6.6                        | 0.2                           | 11.2                          | 60.7                           | 8.0                                   |
|                | neutral        | α       | –27.1                                                                 | –33.4                                                               | 0.1                         | –1.6                        | 6.3                        | 4.5                           | 7.7                           | 53.3                           | 8.1                                   |
|                |                | β       | –27.5                                                                 | –34.8                                                               | –0.1                        | –3.0                        | 7.0                        | 3.0                           | 4.9                           | 57.1                           | 6.3                                   |
|                | monoanionic    | α       | –25.4                                                                 | –33.1                                                               | 0.2                         | –1.7                        | 6.3                        | 4.5                           | 7.9                           | 50.7                           | 8.2                                   |
|                |                | β       | –26.4                                                                 | –34.1                                                               | 0.0                         | –1.8                        | 6.6                        | 1.1                           | 8.1                           | 54.5                           | 7.4                                   |
|                | dianionic      | α       | –23.2                                                                 | –33.2                                                               | 0.2                         | –1.4                        | 6.3                        | 4.5                           | 10.0                          | 51.9                           | 8.7                                   |
|                |                | β       | –23.9                                                                 | –30.8                                                               | 0.2                         | –1.9                        | 6.5                        | 1.5                           | 10.3                          | 51.5                           | 8.1                                   |
|                | G <sup>2</sup> | control | –                                                                     | –28.6                                                               | –30.9                       | 0.0                         | –1.2                       | 6.8                           | 0.5                           | 5.0                            | 68.4                                  |
| neutral        |                | α       | –27.2                                                                 | –34.8                                                               | 0.1                         | –2.4                        | 6.8                        | 3.7                           | 2.5                           | 63.3                           | 6.9                                   |
|                |                | β       | –28.3                                                                 | –36.0                                                               | 0.0                         | –2.8                        | 6.9                        | 3.7                           | 4.2                           | 62.7                           | 6.7                                   |
| monoanionic    |                | α       | –25.0                                                                 | –33.4                                                               | 0.6                         | –2.6                        | 6.8                        | 3.2                           | 4.5                           | 59.5                           | 7.3                                   |
|                |                | β       | –26.6                                                                 | –35.3                                                               | 0.1                         | –2.6                        | 6.9                        | 2.7                           | 3.2                           | 63.8                           | 6.3                                   |
| dianionic      |                | α       | –22.6                                                                 | –32.7                                                               | 0.8                         | –2.1                        | 6.7                        | 3.7                           | 5.8                           | 57.2                           | 7.6                                   |
|                |                | β       | –24.2                                                                 | –35.1                                                               | 0.2                         | –2.8                        | 6.9                        | 2.4                           | 4.3                           | 62.0                           | 6.7                                   |

|                |             |   |       |       |      |      |     |     |     |      |     |
|----------------|-------------|---|-------|-------|------|------|-----|-----|-----|------|-----|
| G <sup>3</sup> | control     | – | –28.8 | –30.7 | 0.3  | –1.0 | 6.5 | 2.0 | 9.8 | 64.0 | 7.8 |
|                | neutral     | α | –27.2 | –34.1 | 0.0  | –2.5 | 6.8 | 3.8 | 2.4 | 62.6 | 6.3 |
|                |             | β | –28.0 | –34.6 | 0.0  | –2.9 | 7.1 | 3.4 | 2.7 | 62.6 | 5.6 |
|                | monoanionic | α | –25.1 | –33.1 | 0.3  | –1.9 | 6.5 | 4.9 | 1.3 | 60.2 | 7.0 |
|                |             | β | –26.5 | –34.7 | 0.1  | –2.8 | 7.1 | 2.8 | 3.2 | 62.4 | 5.6 |
|                | dianionic   | α | –22.8 | –33.0 | 0.2  | –1.5 | 6.3 | 5.4 | 2.6 | 56.8 | 7.7 |
|                |             | β | –24.1 | –34.3 | –0.1 | –3.2 | 7.1 | 2.3 | 1.9 | 58.7 | 6.3 |

<sup>a</sup>Average value calculated from 80000 frames, with each frame recorded every 0.5 ps over the entire 40 ns MD trajectory. <sup>b</sup>Electrostatic interaction energy between the nucleobases forming the Watson-Crick base pair at the lesion site. <sup>c</sup>van der Waals interaction energy between the base pair at the lesion site and the flanking base pairs. <sup>d</sup>Calculated by defining a pseudostep consisting of the two base pairs on the 5'- and 3'-side of the adducted pair. <sup>e</sup>Calculated as the distance between the phosphate atom in the 6<sup>th</sup> and 23<sup>rd</sup> residues when the adduct is at G<sup>1</sup>, the 7<sup>th</sup> and 22<sup>nd</sup> residues when the adduct is at G<sup>2</sup>, and the 9<sup>th</sup> residue and the 20<sup>th</sup> residue when the adduct is at G<sup>3</sup>. The residue numbering within the duplex start from the 5'-end of the adducted strand, and runs from the 3'- to 5'-end of the opposing strand (Figure 1).

**Table S2.** Salient structural and energetic features of the wedge conformations of OTB-dG adducted DNA in the neutral, monoanionic or dianionic OTA ionization state at the G<sup>1</sup>, G<sup>2</sup> or G<sup>3</sup> position in the *NarI* recognition sequence.

| position       | OTB-dG form | rotamer  | $\Delta E_{\text{Hbond}}$<br>(kcal mol <sup>-1</sup> ) <sup>a,b</sup> | $\Delta E_{\text{vdW}}$<br>(kcal mol <sup>-1</sup> ) <sup>a,c</sup> | shift<br>(Å) <sup>a,d</sup> | slide<br>(Å) <sup>a,d</sup> | rise<br>(Å) <sup>a,d</sup> | tilt<br>(deg.) <sup>a,d</sup> | roll<br>(deg.) <sup>a,d</sup> | twist<br>(deg.) <sup>a,d</sup> | minor groove<br>width (Å) <sup>a,e</sup> |
|----------------|-------------|----------|-----------------------------------------------------------------------|---------------------------------------------------------------------|-----------------------------|-----------------------------|----------------------------|-------------------------------|-------------------------------|--------------------------------|------------------------------------------|
| G <sup>1</sup> | control     | –        | –29.0                                                                 | –30.2                                                               | 0.1                         | –0.9                        | 6.6                        | 0.2                           | 11.2                          | 60.7                           | 8.0                                      |
|                | neutral     | $\alpha$ | –9.7                                                                  | –37.4                                                               | 0.3                         | –1.2                        | 6.7                        | 4.7                           | 23.5                          | 58.6                           | 8.9                                      |
|                |             | $\beta$  | –0.9                                                                  | –33.8                                                               | 0.3                         | –1.4                        | 6.4                        | 1.0                           | 16.1                          | 54.9                           | 8.9                                      |
|                | monoanionic | $\alpha$ | –9.7                                                                  | –38.3                                                               | 0.1                         | –1.5                        | 6.6                        | 2.0                           | 17.2                          | 59.2                           | 8.0                                      |
|                |             | $\beta$  | 7.9                                                                   | –32.3                                                               | –0.2                        | –1.9                        | 6.5                        | –1.4                          | 18.0                          | 53.0                           | 9.1                                      |
|                | dianionic   | $\alpha$ | –7.0                                                                  | –34.8                                                               | 0.5                         | –1.2                        | 6.4                        | 2.1                           | 17.9                          | 55.6                           | 9.4                                      |
|                |             | $\beta$  | 11.0                                                                  | –31.8                                                               | –0.3                        | –1.4                        | 6.5                        | –1.8                          | 17.3                          | 54.0                           | 9.4                                      |
| G <sup>2</sup> | control     | –        | –28.6                                                                 | –30.9                                                               | 0.0                         | –1.2                        | 6.8                        | 0.5                           | 5.0                           | 68.4                           | 7.4                                      |
|                | neutral     | $\alpha$ | –10.0                                                                 | –36.7                                                               | 1.1                         | –0.1                        | 6.9                        | 5.4                           | 14.8                          | 68.2                           | 8.4                                      |
|                |             | $\beta$  | 4.7                                                                   | –36.9                                                               | –0.1                        | 0.0                         | 6.1                        | 1.0                           | 2.7                           | 66.9                           | 7.8                                      |
|                | monoanionic | $\alpha$ | 0.9                                                                   | –29.3                                                               | –0.4                        | 0.1                         | 6.1                        | 0.3                           | 10.7                          | 60.6                           | 9.4                                      |
|                |             | $\beta$  | 9.0                                                                   | –30.1                                                               | –0.4                        | 0.1                         | 6.2                        | 1.9                           | 7.0                           | 65.2                           | 9.0                                      |
|                | dianionic   | $\alpha$ | 3.9                                                                   | –29.0                                                               | –0.4                        | 0.1                         | 6.2                        | 0.0                           | 13.4                          | 58.9                           | 9.8                                      |
|                |             | $\beta$  | 11.4                                                                  | –18.2                                                               | –0.4                        | 0.0                         | 6.2                        | 1.6                           | 8.7                           | 63.6                           | 9.6                                      |

|                |             |          |       |       |      |      |     |     |      |      |     |
|----------------|-------------|----------|-------|-------|------|------|-----|-----|------|------|-----|
| G <sup>3</sup> | control     | –        | –28.8 | –30.7 | 0.3  | –1.0 | 6.5 | 2.0 | 9.8  | 64.0 | 7.8 |
|                | neutral     | $\alpha$ | –2.0  | –32.2 | –0.1 | –0.6 | 6.2 | 2.2 | 12.6 | 56.9 | 9.0 |
|                |             | $\beta$  | –5.8  | –34.5 | –0.2 | –1.5 | 6.1 | 3.0 | 13.8 | 56.4 | 9.0 |
|                | monoanionic | $\alpha$ | –10.9 | –38.4 | –0.1 | –1.6 | 6.5 | 4.0 | 17.0 | 61.1 | 7.6 |
|                |             | $\beta$  | 10.4  | –33.0 | –0.0 | –1.1 | 6.3 | 3.4 | 10.2 | 58.0 | 8.8 |
|                | dianionic   | $\alpha$ | –9.0  | –31.4 | 0.0  | –1.5 | 6.5 | 2.3 | 16.8 | 59.5 | 8.2 |
|                |             | $\beta$  | 8.8   | –19.9 | –0.3 | –1.2 | 6.3 | 3.1 | 11.3 | 57.5 | 9.0 |

<sup>a</sup>Average calculated from 80000 frames; each frame recorded every 0.5 ps over the 40 ns MD trajectory. <sup>b</sup>Electrostatic interaction energy between the nucleobases forming the Hoogsteen pair at the lesion site. Values for the natural DNA forming Watson-Crick pair are also provided. <sup>c</sup>van der Waals interaction energy between the base pair at the lesion site and the flanking base pairs. <sup>d</sup>Calculated by defining a pseudostep consisting of the two base pairs on the 5'- and 3'-side of the adducted pair. <sup>e</sup>Calculated as the distance between the phosphate atom in the 6<sup>th</sup> and 23<sup>rd</sup> residues when the adduct is at G<sup>1</sup>, the 7<sup>th</sup> and 22<sup>nd</sup> residues when the adduct is at G<sup>2</sup>, and the 9<sup>th</sup> residue and the 20<sup>th</sup> residue when the adduct is at G<sup>3</sup>. The residue numbering within the duplex start from the 5'-end of the adducted strand, and runs from the 3'- to 5'-end of the opposing strand (Figure 1).



**Table S3.** Salient structural and energetic features of the base-displaced conformations of OTB-dG adducted DNA in the neutral, monoanionic or dianionic OTA ionization state at the G<sup>1</sup>, G<sup>2</sup> or G<sup>3</sup> position in the *NarI* recognition sequence.

| position       | OTB-dG form | rotamer | $\Delta E_{vdW}$<br>(kcal mol <sup>-1</sup> ) <sup>a,b</sup> | shift<br>(Å) <sup>a,c</sup> | slide<br>(Å) <sup>a,c</sup> | rise<br>(Å) <sup>a,c</sup> | tilt<br>(deg.) <sup>a,c</sup> | roll<br>(deg.) <sup>a,c</sup> | twist<br>(deg.) <sup>a,c</sup> | minor groove<br>width (Å) <sup>a,d</sup> |
|----------------|-------------|---------|--------------------------------------------------------------|-----------------------------|-----------------------------|----------------------------|-------------------------------|-------------------------------|--------------------------------|------------------------------------------|
| G <sup>1</sup> | control     | –       | –30.2                                                        | 0.1                         | –0.9                        | 6.6                        | 0.2                           | 11.2                          | 60.7                           | 8.0                                      |
|                | neutral     | α       | –38.0                                                        | 0.7                         | –0.4                        | 7.0                        | –1.1                          | 13.5                          | 24.1                           | 11.3                                     |
|                |             | β       | –39.4                                                        | 0.5                         | 0.9                         | 6.9                        | 1.0                           | 16.1                          | 35.3                           | 11.4                                     |
|                | monoanionic | α       | –37.2                                                        | 0.2                         | –0.7                        | 7.3                        | –0.2                          | 15.3                          | 35.4                           | 9.9                                      |
|                |             | β       | –38.4                                                        | 0.2                         | 1.3                         | 7.2                        | –0.8                          | 16.5                          | 36.6                           | 11.1                                     |
|                | dianionic   | α       | –36.2                                                        | 1.1                         | –0.1                        | 7.3                        | 4.7                           | 13.5                          | 40.4                           | 10.8                                     |
|                |             | β       | –35.7                                                        | –0.2                        | 1.2                         | 7.7                        | 1.1                           | 21.4                          | 34.6                           | 11.4                                     |
| G <sup>2</sup> | control     | –       | –30.9                                                        | 0.0                         | –1.2                        | 6.8                        | 0.5                           | 5.0                           | 68.4                           | 7.4                                      |
|                | neutral     | α       | –33.1                                                        | –0.3                        | 0.0                         | 6.8                        | –1.8                          | 7.1                           | 48.6                           | 9.5                                      |
|                |             | β       | –37.8                                                        | –0.3                        | 1.7                         | 6.5                        | –2.3                          | 9.5                           | 32.6                           | 12.3                                     |
|                | monoanionic | α       | –33.6                                                        | –0.5                        | 1.0                         | 6.8                        | –1.7                          | 9.2                           | 40.1                           | 11.5                                     |
|                |             | β       | –37.6                                                        | 0.0                         | 1.4                         | 6.6                        | 1.1                           | 11.5                          | 34.8                           | 12.2                                     |
|                | dianionic   | α       | –32.3                                                        | –0.7                        | 1.3                         | 6.8                        | –2.0                          | 12.8                          | 37.3                           | 12.3                                     |

|       |             |          |       |      |      |     |      |      |      |      |
|-------|-------------|----------|-------|------|------|-----|------|------|------|------|
|       |             | $\beta$  | -36.4 | 0.1  | 1.4  | 7.1 | 2.4  | 11.1 | 43.9 | 11.2 |
| $G^3$ | control     | -        | -30.7 | 0.3  | -1.0 | 6.5 | 2.0  | 9.8  | 64.0 | 7.8  |
|       | neutral     | $\alpha$ | -35.7 | 1.2  | -2.5 | 7.2 | 7.2  | 14.8 | 63.9 | 7.5  |
|       |             | $\beta$  | -39.5 | 0.1  | 1.4  | 6.9 | 3.4  | 16.0 | 39.3 | 10.8 |
|       | monoanionic | $\alpha$ | -35.4 | 1.1  | -2.8 | 7.2 | 5.5  | 14.1 | 62.2 | 7.8  |
|       |             | $\beta$  | -28.9 | 0.3  | 1.0  | 6.9 | 3.5  | 16.4 | 39.1 | 10.7 |
|       | dianionic   | $\alpha$ | -33.4 | -0.7 | 0.5  | 7.0 | 0.4  | 10.8 | 42.3 | 11.0 |
|       |             | $\beta$  | -34.6 | -0.3 | -0.7 | 7.3 | -1.8 | 18.2 | 37.1 | 10.3 |

<sup>a</sup>Average value calculated from 80000 frames, with each frame recorded every 0.5 ps over the entire 40 ns MD trajectory. <sup>b</sup>van der Waals interaction energy between the base pair at the lesion site and the flanking base pairs. <sup>c</sup>Calculated by defining a pseudostep consisting of the two base pairs on the 5'- and 3'-side of the adducted pair. <sup>d</sup>Calculated as the distance between the phosphate atom in the 6<sup>th</sup> and 23<sup>rd</sup> residues when the adduct is at  $G^1$ , the 7<sup>th</sup> and 22<sup>nd</sup> residues when the adduct is at  $G^2$ , and the 9<sup>th</sup> residue and the 20<sup>th</sup> residue when the adduct is at  $G^3$ . The residue numbering within the duplex start from the 5'-end of the adducted strand, and runs from the 3'- to 5'-end of the opposing strand (Figure 1).



|                         |                   |               |       |       |       |       |       |       |       |
|-------------------------|-------------------|---------------|-------|-------|-------|-------|-------|-------|-------|
| 5'-CG <sup>3</sup> C-3' | 5'C:G             | N4(C) – O6(G) | 99.1  | 99.3  | 98.6  | 99.3  | 97.9  | 99.3  | 98.9  |
|                         |                   | N1(G) – N3(C) | 100.0 | 100.0 | 99.9  | 100.0 | 99.9  | 100.0 | 100.0 |
|                         |                   | N2(G) – O2(C) | 99.8  | 99.9  | 99.8  | 99.9  | 99.9  | 99.9  | 99.9  |
|                         | G <sup>3</sup> :C | N4(C) – O6(G) | 98.5  | 99.0  | 98.2  | 98.9  | 98.7  | 99.1  | 99.1  |
|                         |                   | N1(G) – N3(C) | 100.0 | 100.0 | 99.9  | 99.9  | 99.9  | 99.9  | 100.0 |
|                         |                   | N2(G) – O2(C) | 99.9  | 99.9  | 99.2  | 99.9  | 99.9  | 99.7  | 99.9  |
|                         | 3'C:G             | N4(C) – O6(G) | 98.5  | 98.1  | 98.6  | 98.1  | 99.0  | 98.2  | 98.6  |
|                         |                   | N1(G) – N3(C) | 99.9  | 100.0 | 100.0 | 100.0 | 100.0 | 100.0 | 100.0 |
|                         |                   | N2(G) – O2(C) | 99.9  | 99.9  | 99.9  | 99.6  | 99.9  | 100.0 | 99.9  |

<sup>a</sup>Hydrogen-bond distance cutoff is within 3.40 Å heavy atom separation and 120° X-H-X angle.

**Table S5.** Occupancies of the Hoogsteen hydrogen bonds at the lesion site and the Watson-Crick hydrogen bonds for the 3' and 5' flanking pairs.<sup>a</sup>

| Sequence | Base Pair         | Hydrogen Bond (D–A) | neutral       |               | monoanionic   |               | dianionic     |               | Unmod (%) |
|----------|-------------------|---------------------|---------------|---------------|---------------|---------------|---------------|---------------|-----------|
|          |                   |                     | Wedge (α) (%) | Wedge (β) (%) | Wedge (α) (%) | Wedge (β) (%) | Wedge (α) (%) | Wedge (β) (%) |           |
|          | 5'C:G             | N4(C) – O6(G)       | 98.7          | 98.9          | 98.3          | 98.4          | 98.5          | 98.1          | 98.7      |
|          |                   | N1(G) – N3(C)       | 99.9          | 99.9          | 99.9          | 99.9          | 99.4          | 99.9          | 100.0     |
|          |                   | N2(G) – O2(C)       | 99.6          | 99.0          | 99.6          | 99.6          | 96.8          | 99.7          | 99.9      |
|          | G <sup>1</sup> :C | N4(C) – O6(G)       | 67.2          | 62.9          | 79.6          | 97.7          | 96.2          | 94.6          | 99.1      |

|                         |                   |               |       |       |      |      |      |               |       |
|-------------------------|-------------------|---------------|-------|-------|------|------|------|---------------|-------|
| 5'-CG <sup>1</sup> G-3' |                   | N1(G) – N3(C) | 0.0   | 0.0   | 0.0  | 0.0  | 0.0  | 0.0           | 100.0 |
|                         |                   | N2(G) – O2(C) | 0.0   | 0.0   | 0.0  | 0.0  | 0.0  | 0.0           | 99.9  |
|                         |                   | N4(C) – N7(G) | 15.4  | 11.5  | 34.9 | 0.0  | 50.0 | 0.0           | 0.0   |
|                         | 3'G:C             | N4(C) – O6(G) | 97.7  | 98.0  | 96.6 | 98.8 | 97.3 | 98.9          | 98.7  |
|                         |                   | N1(G) – N3(C) | 99.9  | 99.8  | 99.8 | 99.9 | 99.8 | 99.9          | 99.9  |
|                         |                   | N2(G) – O2(C) | 99.8  | 99.7  | 99.8 | 99.7 | 99.8 | 99.8          | 99.8  |
| 5'-GG <sup>2</sup> C-3' | 5'G:C             | N4(C) – O6(G) | 97.0  | 83.0  | 95.4 | 91.1 | 95.4 | 92.2          | 99.1  |
|                         |                   | N1(G) – N3(C) | 99.8  | 99.7  | 99.9 | 99.6 | 99.8 | 99.7          | 100.0 |
|                         |                   | N2(G) – O2(C) | 99.4  | 99.2  | 99.8 | 99.8 | 99.8 | 99.8          | 99.9  |
|                         | G <sup>2</sup> :C | N4(C) – O6(G) | 73.4  | 11.0  | 98.0 | 87.3 | 98.1 | 93.7          | 98.7  |
|                         |                   | N1(G) – N3(C) | 0.0   | 0.0   | 0.0  | 0.0  | 0.0  | 0.0           | 99.9  |
|                         |                   | N2(G) – O2(C) | 0.0   | 0.0   | 0.0  | 0.0  | 0.0  | 0.0           | 99.8  |
|                         |                   | N4(C) – N7(G) | 9.9   | 0.0   | 0.0  | 0.0  | 0.0  | 0.0           | 0.0   |
|                         | 3'C:G             | N4(C) – O6(G) | 94.4  | 93.7  | 97.7 | 94.2 | 97.2 | 95.4          | 98.9  |
|                         |                   | N1(G) – N3(C) | 98.5  | 99.7  | 99.6 | 99.9 | 99.8 | 99.9          | 100.0 |
| N2(G) – O2(C)           |                   | 97.6          | 97.8  | 98.9  | 99.3 | 99.1 | 99.3 | 99.9          |       |
| 5'-CG <sup>3</sup> C-3' | 5'C:G             | N4(C) – O6(G) | 99.1  | 99.4  | 98.7 | 98.3 | 98.8 | 98.4          | 98.9  |
|                         |                   | N1(G) – N3(C) | 100.0 | 100.0 | 99.9 | 99.9 | 99.7 | 99.9          | 100.0 |
|                         |                   | N2(G) – O2(C) | 99.4  | 99.5  | 99.9 | 99.9 | 99.2 | 99.8          | 99.9  |
|                         | G <sup>3</sup> :C | N4(C) – O6(G) | 89.8  | 87.8  | 97.5 | 89.4 | 98.9 | 96.2,<br>35.8 | 99.1  |
|                         |                   | N1(G) – N3(C) | 0.0   | 0.0   | 0.0  | 0.0  | 0.0  | 0.0           | 100.0 |
|                         |                   | N2(G) – O2(C) | 0.0   | 0.0   | 0.0  | 0.0  | 0.0  | 0.0           | 99.9  |
|                         |                   | N4(C) – N7(G) | 0.0   | 11.5  | 14.0 | 0.0  | 21.0 | 0.0           | 0.0   |



|                         |                   |               |       |       |       |       |       |       |       |
|-------------------------|-------------------|---------------|-------|-------|-------|-------|-------|-------|-------|
|                         |                   | N2(G) – O2(C) | 98.0  | 99.9  | 99.8  | 99.9  | 9.8   | 99.8  | 99.9  |
|                         | G <sup>2</sup> :C | N4(C) – O6(G) | 0.0   | 0.0   | 0.0   | 0.0   | 0.0   | 0.0   | 98.7  |
|                         |                   | N1(G) – N3(C) | 0.0   | 0.0   | 0.0   | 0.0   | 0.0   | 0.0   | 99.9  |
|                         |                   | N2(G) – O2(C) | 0.0   | 0.0   | 0.0   | 0.0   | 0.0   | 0.0   | 99.8  |
|                         |                   | N4(C) – N7(G) | 0.0   | 0.0   | 0.0   | 0.0   | 0.0   | 0.0   | 0.0   |
|                         | 3'C:G             | N4(C) – O6(G) | 99.1  | 99.0  | 99.5  | 98.4  | 99.9  | 98.9  | 98.9  |
|                         |                   | N1(G) – N3(C) | 100.0 | 100.0 | 100.0 | 99.9  | 100.0 | 99.9  | 100.0 |
|                         |                   | N2(G) – O2(C) | 100.0 | 100.0 | 100.0 | 100.0 | 99.9  | 100.0 | 99.9  |
| 5'–CG <sup>3</sup> C–3' | 5'C:G             | N4(C) – O6(G) | 99.1  | 98.7  | 99.3  | 97.5  | 97.8  | 97.4  | 98.9  |
|                         |                   | N1(G) – N3(C) | 100.0 | 99.9  | 100.0 | 100.0 | 99.9  | 100.0 | 100.0 |
|                         |                   | N2(G) – O2(C) | 99.9  | 99.9  | 99.9  | 99.9  | 99.7  | 99.8  | 99.9  |
|                         | G <sup>3</sup> :C | N4(C) – O6(G) | 0.0   | 0.0   | 0.0   | 0.0   | 0.0   | 0.0   | 99.1  |
|                         |                   | N1(G) – N3(C) | 0.0   | 0.0   | 0.0   | 0.0   | 0.0   | 0.0   | 100.0 |
|                         |                   | N2(G) – O2(C) | 0.0   | 0.0   | 0.0   | 0.0   | 0.0   | 0.0   | 99.9  |
|                         | 3'C:G             | N4(C) – N7(G) | 0.0   | 0.0   | 0.0   | 0.0   | 0.0   | 0.0   | 0.0   |
|                         |                   | N4(C) – O6(G) | 99.0  | 69.6  | 98.7  | 96.7  | 99.1  | 97.3  | 98.6  |
|                         |                   | N1(G) – N3(C) | 100.0 | 76.2  | 99.9  | 99.8  | 100.0 | 99.8  | 100.0 |
|                         |                   | N2(G) – O2(C) | 99.9  | 69.6  | 99.8  | 100.0 | 99.9  | 99.9  | 99.9  |

<sup>a</sup>Hydrogen bond distance cut-off within 3.40 Å heavy atom separation and 120° X-H-X angle

**Table S7.** Hydrogen-bond occupancies for the base pairs at the terminal ends of the natural and OTB-dG modified *NarI* helices.<sup>a</sup>

| Position | ionization state of OTA | conformer (rotamer)                      | C1:G24 pair     |           | C12:G13 pair    |           |
|----------|-------------------------|------------------------------------------|-----------------|-----------|-----------------|-----------|
|          |                         |                                          | bond            | occupancy | bond            | occupancy |
|          | neutral                 | major groove ( $\alpha$ )                | N4-H(C)...O6(G) | 92.7      | N4-H(C)...O6(G) | 97.4      |
|          |                         |                                          | N1-H(G)...N3(C) | 97.1      | N1-H(G)...N3(C) | 99.5      |
|          |                         |                                          | N2-H(G)...O2(C) | 96.1      | N2-H(G)...O2(C) | 99.6      |
|          |                         | major groove ( $\beta$ )                 | N4-H(C)...O6(G) | 97.4      | N4-H(C)...O6(G) | 97.2      |
|          |                         |                                          | N1-H(G)...N3(C) | 99.9      | N1-H(G)...N3(C) | 99.3      |
|          |                         |                                          | N2-H(G)...O2(C) | 99.6      | N2-H(G)...O2(C) | 99.6      |
|          |                         | wedge ( $\alpha$ )                       | N4-H(C)...O6(G) | 95.9      | N4-H(C)...O6(G) | 97.5      |
|          |                         |                                          | N1-H(G)...N3(C) | 99.8      | N1-H(G)...N3(C) | 99.2      |
|          |                         |                                          | N2-H(G)...O2(C) | 99.4      | N2-H(G)...O2(C) | 99.3      |
|          |                         | wedge ( $\beta$ )                        | N4-H(C)...O6(G) | 74.1      | N4-H(C)...O6(G) | 97.5      |
|          |                         |                                          | N1-H(G)...N3(C) | 85.8      | N1-H(G)...N3(C) | 99.6      |
|          |                         |                                          | N2-H(G)...O2(C) | 90.8      | N2-H(G)...O2(C) | 99.6      |
|          |                         | base-displaced intercalated ( $\alpha$ ) | N4-H(C)...O6(G) | 95.3      | N4-H(C)...O6(G) | 97.1      |
|          |                         |                                          | N1-H(G)...N3(C) | 98.5      | N1-H(G)...N3(C) | 99.1      |



|                |             |                                            |                 |                 |                 |                 |      |
|----------------|-------------|--------------------------------------------|-----------------|-----------------|-----------------|-----------------|------|
| G <sup>1</sup> |             |                                            | N2-H(G)...O2(C) | 98.4            | N2-H(G)...O2(C) | 99.6            |      |
|                |             | base-displaced<br>intercalated ( $\beta$ ) | N4-H(C)...O6(G) | 97.5            | N4-H(C)...O6(G) | 97.6            |      |
|                |             |                                            | N1-H(G)...N3(C) | 99.9            | N1-H(G)...N3(C) | 99.6            |      |
|                |             |                                            | N2-H(G)...O2(C) | 99.4            | N2-H(G)...O2(C) | 99.5            |      |
|                | monoanionic | major groove ( $\alpha$ )                  | N4-H(C)...O6(G) | 91.0            | N4-H(C)...O6(G) | 97.6            |      |
|                |             |                                            | N1-H(G)...N3(C) | 98.3            | N1-H(G)...N3(C) | 99.6            |      |
|                |             |                                            | N2-H(G)...O2(C) | 97.8            | N2-H(G)...O2(C) | 99.6            |      |
|                |             | major groove ( $\beta$ )                   | N4-H(C)...O6(G) | 93.6            | N4-H(C)...O6(G) | 97.7            |      |
|                |             |                                            | N1-H(G)...N3(C) | 99.1            | N1-H(G)...N3(C) | 99.6            |      |
|                |             |                                            | N2-H(G)...O2(C) | 98.3            | N2-H(G)...O2(C) | 99.5            |      |
|                |             | wedge ( $\alpha$ )                         | N4-H(C)...O6(G) | 76.4            | N4-H(C)...O6(G) | 97.2            |      |
|                |             |                                            | N1-H(G)...N3(C) | 82.9            | N1-H(G)...N3(C) | 99.2            |      |
|                |             |                                            | N2-H(G)...O2(C) | 85.0            | N2-H(G)...O2(C) | 99.5            |      |
|                |             | wedge ( $\beta$ )                          | N4-H(C)...O6(G) | 95.9            | N4-H(C)...O6(G) | 97.1            |      |
|                |             |                                            | N1-H(G)...N3(C) | 98.3            | N1-H(G)...N3(C) | 99.4            |      |
|                |             |                                            | N2-H(G)...O2(C) | 98.0            | N2-H(G)...O2(C) | 99.5            |      |
|                |             |                                            |                 | N4-H(C)...O6(G) | 31.4            | N4-H(C)...O6(G) | 96.7 |

|  |                                             |                                            |                 |                 |                 |      |
|--|---------------------------------------------|--------------------------------------------|-----------------|-----------------|-----------------|------|
|  | base-displaced<br>intercalated ( $\alpha$ ) | N1-H(G)...N3(C)                            | 32.4            | N1-H(G)...N3(C) | 98.4            |      |
|  |                                             | N2-H(G)...O2(C)                            | 32.5            | N2-H(G)...O2(C) | 99.1            |      |
|  |                                             | N2-H(G)...N3(G)                            | 51.0            | -               | -               |      |
|  |                                             | N1-H(G)...N3(C)                            | 24.6            | -               | -               |      |
|  |                                             | base-displaced<br>intercalated ( $\beta$ ) | N4-H(C)...O6(G) | 96.8            | N4-H(C)...O6(G) | 96.8 |
|  |                                             |                                            | N1-H(G)...N3(C) | 99.4            | N1-H(G)...N3(C) | 98.7 |
|  |                                             |                                            | N2-H(G)...O2(C) | 99.3            | N2-H(G)...O2(C) | 99.3 |
|  | dianionic                                   | major groove ( $\alpha$ )                  | N4-H(C)...O6(G) | 93.0            | N4-H(C)...O6(G) | 96.5 |
|  |                                             |                                            | N1-H(G)...N3(C) | 99.9            | N1-H(G)...N3(C) | 98.5 |
|  |                                             |                                            | N2-H(G)...O2(C) | 99.0            | N2-H(G)...O2(C) | 99.2 |
|  |                                             | major groove ( $\beta$ )                   | N4-H(C)...O6(G) | 94.2            | N4-H(C)...O6(G) | 97.3 |
|  |                                             |                                            | N1-H(G)...N3(C) | 98.2            | N1-H(G)...N3(C) | 99.3 |
|  |                                             |                                            | N2-H(G)...O2(C) | 97.4            | N2-H(G)...O2(C) | 99.6 |
|  |                                             | wedge ( $\alpha$ )                         | N4-H(C)...O6(G) | 94.5            | N4-H(C)...O6(G) | 97.4 |
|  |                                             |                                            | N1-H(G)...N3(C) | 97.6            | N1-H(G)...N3(C) | 99.3 |
|  |                                             |                                            | N2-H(G)...O2(C) | 97.0            | N2-H(G)...O2(C) | 99.4 |
|  |                                             |                                            | N4-H(C)...O6(G) | 95.2            | N4-H(C)...O6(G) | 46.8 |

|                          |                 |                                             |                           |                 |                 |                 |
|--------------------------|-----------------|---------------------------------------------|---------------------------|-----------------|-----------------|-----------------|
|                          |                 | wedge ( $\beta$ )                           | N1-H(G)...N3(C)           | 98.6            | N1-H(G)...N3(C) | 48.8            |
|                          |                 |                                             | N2-H(G)...O2(C)           | 99.1            | N2-H(G)...O2(C) | 48.2            |
|                          |                 | base-displaced<br>intercalated ( $\alpha$ ) | N4-H(C)...O6(G)           | 92.7            | N4-H(C)...O6(G) | 97.0            |
|                          |                 |                                             | N1-H(G)...N3(C)           | 95.2            | N1-H(G)...N3(C) | 99.1            |
|                          |                 |                                             | N2-H(G)...O2(C)           | 94.6            | N2-H(G)...O2(C) | 99.5            |
|                          |                 | base-displaced<br>intercalated ( $\beta$ )  | N4-H(C)...O6(G)           | 97.4            | N4-H(C)...O6(G) | 97.1            |
|                          |                 |                                             | N1-H(G)...N3(C)           | 99.6            | N1-H(G)...N3(C) | 99.0            |
|                          |                 |                                             | N2-H(G)...O2(C)           | 99.3            | N2-H(G)...O2(C) | 99.5            |
|                          |                 | neutral                                     | major groove ( $\alpha$ ) | N4-H(C)...O6(G) | 96.1            | N4-H(C)...O6(G) |
| N1-H(G)...N3(C)          | 99.5            |                                             |                           | N1-H(G)...N3(C) | 99.3            |                 |
| N2-H(G)...O2(C)          | 99.0            |                                             |                           | N2-H(G)...O2(C) | 99.5            |                 |
| major groove ( $\beta$ ) | N4-H(C)...O6(G) |                                             | 95.8                      | N4-H(C)...O6(G) | 97.2            |                 |
|                          | N1-H(G)...N3(C) |                                             | 98.8                      | N1-H(G)...N3(C) | 99.4            |                 |
|                          | N2-H(G)...O2(C) |                                             | 98.4                      | N2-H(G)...O2(C) | 99.6            |                 |
| wedge ( $\alpha$ )       | N4-H(C)...O6(G) |                                             | 94.4                      | N4-H(C)...O6(G) | 96.5            |                 |
|                          | N1-H(G)...N3(C) |                                             | 99.1                      | N1-H(G)...N3(C) | 98.7            |                 |
|                          | N2-H(G)...O2(C) |                                             | 97.9                      | N2-H(G)...O2(C) | 99.4            |                 |

|  |             |                                             |                 |      |                 |      |
|--|-------------|---------------------------------------------|-----------------|------|-----------------|------|
|  |             | wedge ( $\beta$ )                           | N4-H(C)...O6(G) | 93.4 | N4-H(C)...O6(G) | 54.8 |
|  |             |                                             | N1-H(G)...N3(C) | 98.2 | N1-H(G)...N3(C) | 56.9 |
|  |             |                                             | N2-H(G)...O2(C) | 98.7 | N2-H(G)...O2(C) | 61.3 |
|  |             | base-displaced<br>intercalated ( $\alpha$ ) | N4-H(C)...O6(G) | 95.9 | N4-H(C)...O6(G) | 97.4 |
|  |             |                                             | N1-H(G)...N3(C) | 99.0 | N1-H(G)...N3(C) | 99.4 |
|  |             |                                             | N2-H(G)...O2(C) | 98.4 | N2-H(G)...O2(C) | 99.6 |
|  |             | base-displaced<br>intercalated ( $\beta$ )  | N4-H(C)...O6(G) | 96.7 | N4-H(C)...O6(G) | 97.2 |
|  |             |                                             | N1-H(G)...N3(C) | 99.9 | N1-H(G)...N3(C) | 99.3 |
|  |             |                                             | N2-H(G)...O2(C) | 99.3 | N2-H(G)...O2(C) | 99.6 |
|  | monoanionic | major groove ( $\alpha$ )                   | N4-H(C)...O6(G) | 69.5 | N4-H(C)...O6(G) | 96.0 |
|  |             |                                             | N1-H(G)...N3(C) | 72.3 | N1-H(G)...N3(C) | 97.8 |
|  |             |                                             | N2-H(G)...O2(C) | 72.0 | N2-H(G)...O2(C) | 99.0 |
|  |             | major groove ( $\beta$ )                    | N4-H(C)...O6(G) | 95.1 | N4-H(C)...O6(G) | 97.1 |
|  |             |                                             | N1-H(G)...N3(C) | 99.8 | N1-H(G)...N3(C) | 99.1 |
|  |             |                                             | N2-H(G)...O2(C) | 99.3 | N2-H(G)...O2(C) | 99.6 |
|  |             | wedge ( $\alpha$ )                          | N4-H(C)...O6(G) | 95.6 | N4-H(C)...O6(G) | 97.5 |
|  |             |                                             | N1-H(G)...N3(C) | 99.8 | N1-H(G)...N3(C) | 99.1 |

|                |                  |                                 |                  |                 |                 |                 |      |
|----------------|------------------|---------------------------------|------------------|-----------------|-----------------|-----------------|------|
| G <sup>2</sup> |                  |                                 | N2-H(G)...O2(C)  | 99.3            | N2-H(G)...O2(C) | 99.6            |      |
|                |                  | wedge (β)                       | N4-H(C)...O6(G)  | 95.6            | N4-H(C)...O6(G) | 95.8            |      |
|                |                  |                                 | N1-H(G)...N3(C)  | 99.6            | N1-H(G)...N3(C) | 97.8            |      |
|                |                  |                                 | N2-H(G)...O2(C)  | 99.3            | N2-H(G)...O2(C) | 98.9            |      |
|                |                  | base-displaced intercalated (α) | N4-H(C)...O6(G)  | 96.2            | N4-H(C)...O6(G) | 97.4            |      |
|                |                  |                                 | N1-H(G)...N3(C)  | 99.8            | N1-H(G)...N3(C) | 99.3            |      |
|                |                  |                                 | N2-H(G)...O2(C)  | 99.2            | N2-H(G)...O2(C) | 99.6            |      |
|                |                  | base-displaced intercalated (β) | N4-H(C)...O6(G)  | 96.2            | N4-H(C)...O6(G) | 95.4            |      |
|                |                  |                                 | N1-H(G)...N3(C)  | 96.2            | N1-H(G)...N3(C) | 97.4            |      |
|                |                  |                                 | N2-H(G)...O2(C)  | 95.6            | N2-H(G)...O2(C) | 98.3            |      |
|                |                  | dianionic                       | major groove (α) | N4-H(C)...O6(G) | 80.6            | N4-H(C)...O6(G) | 79.9 |
|                |                  |                                 |                  | N1-H(G)...N3(C) | 78.9            | N1-H(G)...N3(C) | 73.0 |
|                | N2-H(G)...O2(C)  |                                 |                  | 78.5            | N2-H(G)...O2(C) | 73.2            |      |
|                | major groove (β) |                                 | N4-H(C)...O6(G)  | 98.6            | N4-H(C)...O6(G) | 96.5            |      |
|                |                  |                                 | N1-H(G)...N3(C)  | 98.9            | N1-H(G)...N3(C) | 98.6            |      |
|                |                  |                                 | N2-H(G)...O2(C)  | 99.3            | N2-H(G)...O2(C) | 96.5            |      |
|                |                  |                                 |                  | N4-H(C)...O6(G) | 95.6            | N4-H(C)...O6(G) | 94.5 |

|                 |      |                                             |                           |                 |                 |                 |      |
|-----------------|------|---------------------------------------------|---------------------------|-----------------|-----------------|-----------------|------|
|                 |      | wedge ( $\alpha$ )                          | N1-H(G)...N3(C)           | 99.0            | N1-H(G)...N3(C) | 96.7            |      |
|                 |      |                                             | N2-H(G)...O2(C)           | 98.5            | N2-H(G)...O2(C) | 98.3            |      |
|                 |      | wedge ( $\beta$ )                           | N4-H(C)...O6(G)           | 96.4            | N4-H(C)...O6(G) | 97.0            |      |
|                 |      |                                             | N1-H(G)...N3(C)           | 99.9            | N1-H(G)...N3(C) | 99.2            |      |
|                 |      |                                             | N2-H(G)...O2(C)           | 99.3            | N2-H(G)...O2(C) | 99.5            |      |
|                 |      | base-displaced<br>intercalated ( $\alpha$ ) | N4-H(C)...O6(G)           | 85.0            | N4-H(C)...O6(G) | 99.2            |      |
|                 |      |                                             | N1-H(G)...N3(C)           | 93.1            | N1-H(G)...N3(C) | 99.5            |      |
|                 |      |                                             | N2-H(G)...O2(C)           | 96.1            | N2-H(G)...O2(C) | 97.1            |      |
|                 |      | base-displaced<br>intercalated ( $\beta$ )  | N4-H(C)...O6(G)           | 95.8            | N4-H(C)...O6(G) | 95.6            |      |
|                 |      |                                             | N1-H(G)...N3(C)           | 99.4            | N1-H(G)...N3(C) | 97.8            |      |
|                 |      |                                             | N2-H(G)...O2(C)           | 98.7            | N2-H(G)...O2(C) | 98.2            |      |
|                 |      | neutral                                     | major groove ( $\alpha$ ) | N4-H(C)...O6(G) | 83.3            | N4-H(C)...O6(G) | 96.4 |
|                 |      |                                             |                           | N1-H(G)...N3(C) | 87.6            | N1-H(G)...N3(C) | 98.8 |
|                 |      |                                             |                           | N2-H(G)...O2(C) | 87.5            | N2-H(G)...O2(C) | 99.0 |
|                 |      |                                             | major groove ( $\beta$ )  | N4-H(C)...O6(G) | 94.6            | N4-H(C)...O6(G) | 97.5 |
| N1-H(G)...N3(C) | 99.1 |                                             |                           | N1-H(G)...N3(C) | 99.4            |                 |      |
| N2-H(G)...O2(C) | 98.7 |                                             |                           | N2-H(G)...O2(C) | 99.6            |                 |      |

|  |             |                                             |                 |      |                 |      |
|--|-------------|---------------------------------------------|-----------------|------|-----------------|------|
|  |             | wedge ( $\alpha$ )                          | N4-H(C)...O6(G) | 95.7 | N4-H(C)...O6(G) | 97.5 |
|  |             |                                             | N1-H(G)...N3(C) | 99.8 | N1-H(G)...N3(C) | 99.4 |
|  |             |                                             | N2-H(G)...O2(C) | 99.3 | N2-H(G)...O2(C) | 99.7 |
|  |             | wedge ( $\beta$ )                           | N4-H(C)...O6(G) | 95.4 | N4-H(C)...O6(G) | 97.1 |
|  |             |                                             | N1-H(G)...N3(C) | 99.7 | N1-H(G)...N3(C) | 99.1 |
|  |             |                                             | N2-H(G)...O2(C) | 99.4 | N2-H(G)...O2(C) | 99.6 |
|  |             | base-displaced<br>intercalated ( $\alpha$ ) | N4-H(C)...O6(G) | 95.4 | N4-H(C)...O6(G) | 88.5 |
|  |             |                                             | N1-H(G)...N3(C) | 99.9 | N1-H(G)...N3(C) | 90.5 |
|  |             |                                             | N2-H(G)...O2(C) | 99.4 | N2-H(G)...O2(C) | 94.4 |
|  |             | base-displaced<br>intercalated ( $\beta$ )  | N4-H(C)...O6(G) | 95.2 | N4-H(C)...O6(G) | 97.4 |
|  |             |                                             | N1-H(G)...N3(C) | 99.4 | N1-H(G)...N3(C) | 99.3 |
|  |             |                                             | N2-H(G)...O2(C) | 99.2 | N2-H(G)...O2(C) | 99.4 |
|  | monoanionic | major groove ( $\alpha$ )                   | N4-H(C)...O6(G) | 95.5 | N4-H(C)...O6(G) | 84.8 |
|  |             |                                             | N1-H(G)...N3(C) | 99.7 | N1-H(G)...N3(C) | 87.3 |
|  |             |                                             | N2-H(G)...O2(C) | 99.2 | N2-H(G)...O2(C) | 91.4 |
|  |             | major groove ( $\beta$ )                    | N4-H(C)...O6(G) | 95.7 | N4-H(C)...O6(G) | 94.3 |
|  |             |                                             | N1-H(G)...N3(C) | 99.7 | N1-H(G)...N3(C) | 96.2 |
|  |             |                                             |                 |      |                 |      |

|                |                 |                                             |                 |                 |                 |      |
|----------------|-----------------|---------------------------------------------|-----------------|-----------------|-----------------|------|
| G <sup>3</sup> |                 |                                             | N2-H(G)...O2(C) | 99.2            | N2-H(G)...O2(C) | 98.2 |
|                |                 | wedge ( $\alpha$ )                          | N4-H(C)...O6(G) | 95.8            | N4-H(C)...O6(G) | 97.4 |
|                |                 |                                             | N1-H(G)...N3(C) | 99.1            | N1-H(G)...N3(C) | 99.5 |
|                |                 |                                             | N2-H(G)...O2(C) | 98.6            | N2-H(G)...O2(C) | 99.5 |
|                |                 | wedge ( $\beta$ )                           | N4-H(C)...O6(G) | 95.4            | N4-H(C)...O6(G) | 94.6 |
|                |                 |                                             | N1-H(G)...N3(C) | 99.7            | N1-H(G)...N3(C) | 96.7 |
|                |                 |                                             | N2-H(G)...O2(C) | 99.2            | N2-H(G)...O2(C) | 98.7 |
|                |                 | base-displaced<br>intercalated ( $\alpha$ ) | N4-H(C)...O6(G) | 96.0            | N4-H(C)...O6(G) | 97.0 |
|                |                 |                                             | N1-H(G)...N3(C) | 98.2            | N1-H(G)...N3(C) | 99.1 |
|                |                 |                                             | N2-H(G)...O2(C) | 97.7            | N2-H(G)...O2(C) | 99.6 |
|                |                 | base-displaced<br>intercalated ( $\beta$ )  | N4-H(C)...O6(G) | 70.6            | N4-H(C)...O6(G) | 96.6 |
|                |                 |                                             | N1-H(G)...N3(C) | 83.8            | N1-H(G)...N3(C) | 99.2 |
|                | N2-H(G)...O2(C) |                                             | 88.6            | N2-H(G)...O2(C) | 99.2            |      |
|                | dianionic       | major groove ( $\alpha$ )                   | N4-H(C)...O6(G) | 95.7            | N4-H(C)...O6(G) | 97.4 |
|                |                 |                                             | N1-H(G)...N3(C) | 99.9            | N1-H(G)...N3(C) | 99.5 |
|                |                 |                                             | N2-H(G)...O2(C) | 99.4            | N2-H(G)...O2(C) | 99.5 |
|                |                 |                                             | N4-H(C)...O6(G) | 95.3            | N4-H(C)...O6(G) | 96.0 |



|  |  |                                             |                 |      |                 |      |
|--|--|---------------------------------------------|-----------------|------|-----------------|------|
|  |  | major groove ( $\beta$ )                    | N1-H(G)...N3(C) | 99.7 | N1-H(G)...N3(C) | 98.0 |
|  |  |                                             | N2-H(G)...O2(C) | 99.3 | N2-H(G)...O2(C) | 98.8 |
|  |  | wedge ( $\alpha$ )                          | N4-H(C)...O6(G) | 96.2 | N4-H(C)...O6(G) | 97.6 |
|  |  |                                             | N1-H(G)...N3(C) | 99.6 | N1-H(G)...N3(C) | 99.6 |
|  |  |                                             | N2-H(G)...O2(C) | 99.0 | N2-H(G)...O2(C) | 99.6 |
|  |  | wedge ( $\beta$ )                           | N4-H(C)...O6(G) | 95.7 | N4-H(C)...O6(G) | 95.9 |
|  |  |                                             | N1-H(G)...N3(C) | 99.8 | N1-H(G)...N3(C) | 97.9 |
|  |  |                                             | N2-H(G)...O2(C) | 99.4 | N2-H(G)...O2(C) | 98.9 |
|  |  | base-displaced<br>intercalated ( $\alpha$ ) | N4-H(C)...O6(G) | 95.5 | N4-H(C)...O6(G) | 97.5 |
|  |  |                                             | N1-H(G)...N3(C) | 99.8 | N1-H(G)...N3(C) | 99.5 |
|  |  |                                             | N2-H(G)...O2(C) | 99.3 | N2-H(G)...O2(C) | 99.6 |
|  |  | base-displaced<br>intercalated ( $\beta$ )  | N4-H(C)...O6(G) | 95.7 | N4-H(C)...O6(G) | 96.4 |
|  |  |                                             | N1-H(G)...N3(C) | 99.8 | N1-H(G)...N3(C) | 98.4 |
|  |  |                                             | N2-H(G)...O2(C) | 99.4 | N2-H(G)...O2(C) | 99.3 |

<sup>a</sup>Hydrogen-bond distance cutoff is within 3.40 Å heavy atom separation and 120° X-H-X angle.

**Table S8.** Partial charges of the neutral OTB-dG adduct generated using the RED program (atom numbering provided).

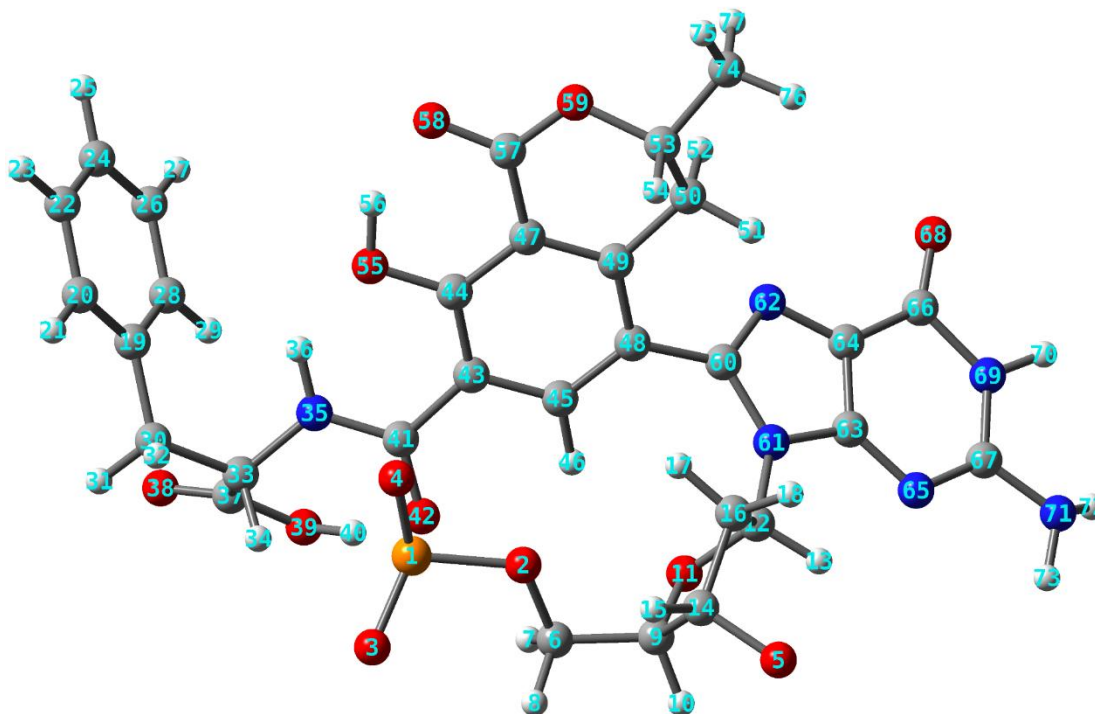

| Atom no. | Symbol | Atom type | Atomic charge |
|----------|--------|-----------|---------------|
| 1        | P      | P         | 1.1706        |
| 2        | O      | OS        | -0.4973       |
| 3        | O      | O2        | -0.7693       |
| 4        | O      | O2        | -0.7693       |
| 5        | O      | OS        | -0.544        |
| 6        | C      | CI        | -0.0335       |
| 7        | H      | H1        | 0.0862        |
| 8        | H      | H1        | 0.0862        |
| 9        | C      | CT        | 0.1607        |
| 10       | H      | H1        | 0.0844        |

|    |   |    |         |
|----|---|----|---------|
| 11 | O | OS | -0.3953 |
| 12 | C | CT | 0.1501  |
| 13 | H | H2 | 0.035   |
| 14 | C | CT | 0.173   |
| 15 | H | H1 | 0.0625  |
| 16 | C | CT | -0.0039 |
| 17 | H | HC | 0.0336  |
| 18 | H | HC | 0.0336  |
| 19 | C | CA | 0.0072  |
| 20 | C | CA | -0.0855 |
| 21 | H | HA | 0.1389  |
| 22 | C | CA | -0.1933 |
| 23 | H | HA | 0.1489  |
| 24 | C | CA | -0.1123 |
| 25 | H | HA | 0.1356  |
| 26 | C | CA | -0.1748 |
| 27 | H | HA | 0.1477  |
| 28 | C | CA | -0.1147 |
| 29 | H | HA | 0.1101  |
| 30 | C | CT | -0.101  |
| 31 | H | HC | 0.0629  |
| 32 | H | HC | 0.0629  |
| 33 | C | CT | -0.0087 |
| 34 | H | H1 | 0.0906  |

|    |   |    |         |
|----|---|----|---------|
| 35 | N | N  | -0.2329 |
| 36 | H | H  | 0.2161  |
| 37 | C | C  | 0.6594  |
| 38 | O | O  | -0.5178 |
| 39 | O | OH | -0.6158 |
| 40 | H | HO | 0.4385  |
| 41 | C | C  | 0.4301  |
| 42 | O | O  | -0.5901 |
| 43 | C | CA | -0.0215 |
| 44 | C | CA | 0.0799  |
| 45 | C | CA | -0.0174 |
| 46 | H | HA | 0.1589  |
| 47 | C | CA | -0.0876 |
| 48 | C | CA | -0.0181 |
| 49 | C | CA | -0.085  |
| 50 | C | CT | -0.0203 |
| 51 | H | HC | 0.0665  |
| 52 | H | HC | 0.0665  |
| 53 | C | CT | 0.3187  |
| 54 | H | H1 | 0.0234  |
| 55 | O | OH | -0.4558 |
| 56 | H | HO | 0.4378  |
| 57 | C | C  | 0.7249  |
| 58 | O | O  | -0.5964 |

|    |   |    |         |
|----|---|----|---------|
| 59 | O | OS | -0.4341 |
| 60 | C | CK | 0.1759  |
| 61 | N | N* | 0.0358  |
| 62 | N | NB | -0.444  |
| 63 | C | CB | 0.1588  |
| 64 | C | CB | 0.0765  |
| 65 | N | NC | -0.4179 |
| 66 | C | C  | 0.4743  |
| 67 | C | CA | 0.5064  |
| 68 | O | O  | -0.538  |
| 69 | N | NA | -0.4021 |
| 70 | H | H  | 0.3382  |
| 71 | N | N2 | -0.8147 |
| 72 | H | H  | 0.38    |
| 73 | H | H  | 0.38    |
| 74 | C | CT | -0.2576 |
| 75 | H | HC | 0.0811  |
| 76 | H | HC | 0.0811  |
| 77 | H | HC | 0.0811  |

**Table S9.** Partial charges of the monoanionic (carboxylic group ionized) OTB-dG adduct generated using the RED program (atom numbering provided).

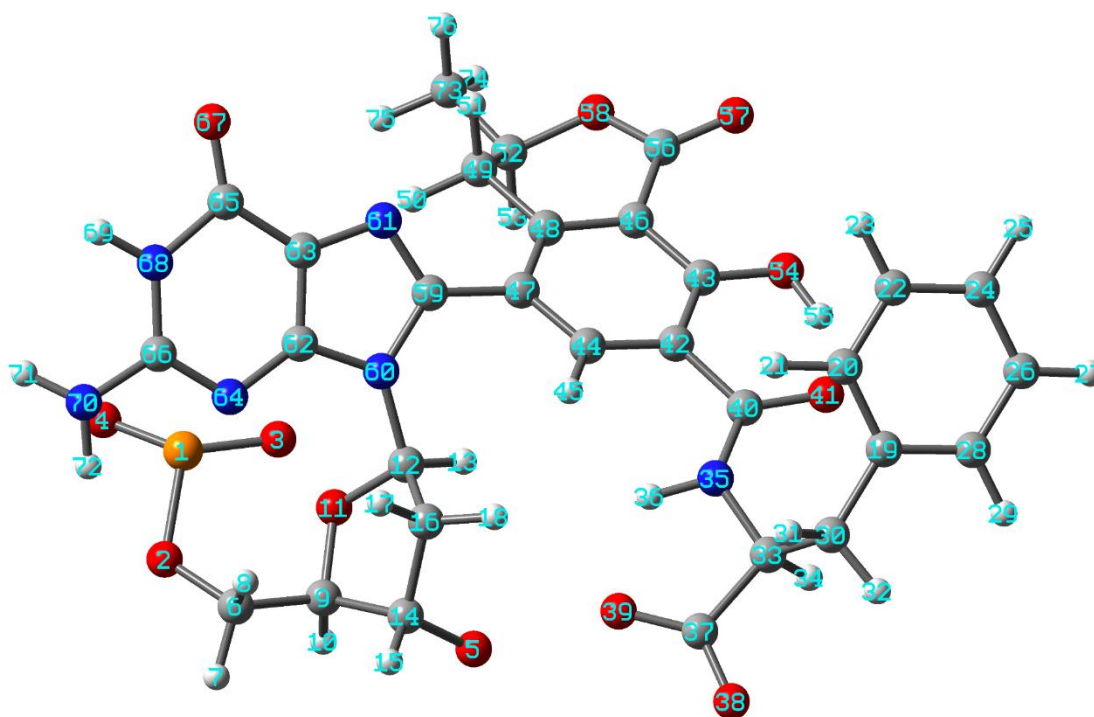

| Atom no. | Symbol | Atom type | Atomic charge |
|----------|--------|-----------|---------------|
| 1        | P      | P         | 1.1658        |
| 2        | O      | OS        | -0.5093       |
| 3        | O      | O2        | -0.7674       |
| 4        | O      | O2        | -0.7674       |
| 5        | O      | OS        | -0.5408       |
| 6        | C      | Cl        | 0.0116        |
| 7        | H      | H1        | 0.073         |
| 8        | H      | H1        | 0.073         |
| 9        | C      | CT        | 0.1496        |
| 10       | H      | H1        | 0.1153        |
| 11       | O      | OS        | -0.4216       |

|    |   |    |         |
|----|---|----|---------|
| 12 | C | CT | -0.0633 |
| 13 | H | H2 | 0.2083  |
| 14 | C | CT | 0.1291  |
| 15 | H | H1 | 0.0747  |
| 16 | C | CT | -0.0717 |
| 17 | H | HC | 0.0491  |
| 18 | H | HC | 0.0491  |
| 19 | C | CA | 0.0155  |
| 20 | C | CA | -0.0912 |
| 21 | H | HA | 0.1453  |
| 22 | C | CA | -0.1824 |
| 23 | H | HA | 0.1271  |
| 24 | C | CA | -0.1216 |
| 25 | H | HA | 0.1167  |
| 26 | C | CA | -0.1793 |
| 27 | H | HA | 0.1342  |
| 28 | C | CA | -0.186  |
| 29 | H | HA | 0.1598  |
| 30 | C | CT | -0.0585 |
| 31 | H | HC | 0.0425  |
| 32 | H | HC | 0.0425  |
| 33 | C | CT | 0.0324  |
| 34 | H | H1 | 0.0614  |
| 35 | N | N  | -0.2321 |
| 36 | H | H  | 0.1873  |
| 37 | C | C  | 0.68    |
| 38 | O | O2 | -0.6897 |
| 39 | O | O2 | -0.6865 |
| 40 | C | C  | 0.4082  |
| 41 | O | O  | -0.5622 |
| 42 | C | CA | -0.0299 |
| 43 | C | CA | 0.2541  |
| 44 | C | CA | -0.2864 |
| 45 | H | HA | 0.227   |
| 46 | C | CA | -0.1049 |
| 47 | C | CA | -0.0382 |
| 48 | C | CA | -0.0806 |
| 49 | C | CT | -0.0313 |
| 50 | H | HC | 0.0659  |
| 51 | H | HC | 0.0659  |
| 52 | C | CT | 0.3359  |

|    |   |    |         |
|----|---|----|---------|
| 53 | H | H1 | 0.0019  |
| 54 | O | OH | -0.5191 |
| 55 | H | HO | 0.4278  |
| 56 | C | C  | 0.7597  |
| 57 | O | O  | -0.5604 |
| 58 | O | OS | -0.4985 |
| 59 | C | CK | 0.3168  |
| 60 | N | N* | 0.0364  |
| 61 | N | NB | -0.5346 |
| 62 | C | CB | 0.1063  |
| 63 | C | CB | 0.1361  |
| 64 | N | NC | -0.375  |
| 65 | C | C  | 0.4291  |
| 66 | C | CA | 0.4623  |
| 67 | O | O  | -0.5465 |
| 68 | N | NA | -0.3501 |
| 69 | H | H  | 0.3233  |
| 70 | N | N2 | -0.8095 |
| 71 | H | H  | 0.3664  |
| 72 | H | H  | 0.3664  |
| 73 | C | CT | -0.2181 |
| 74 | H | HC | 0.0605  |
| 75 | H | HC | 0.0605  |
| 76 | H | HC | 0.0605  |



**Table S10.** Partial charges of the dianionic (carboxylic and phenolic group ionized) OTB-dG adduct generated using the RED program (atom numbering provided).

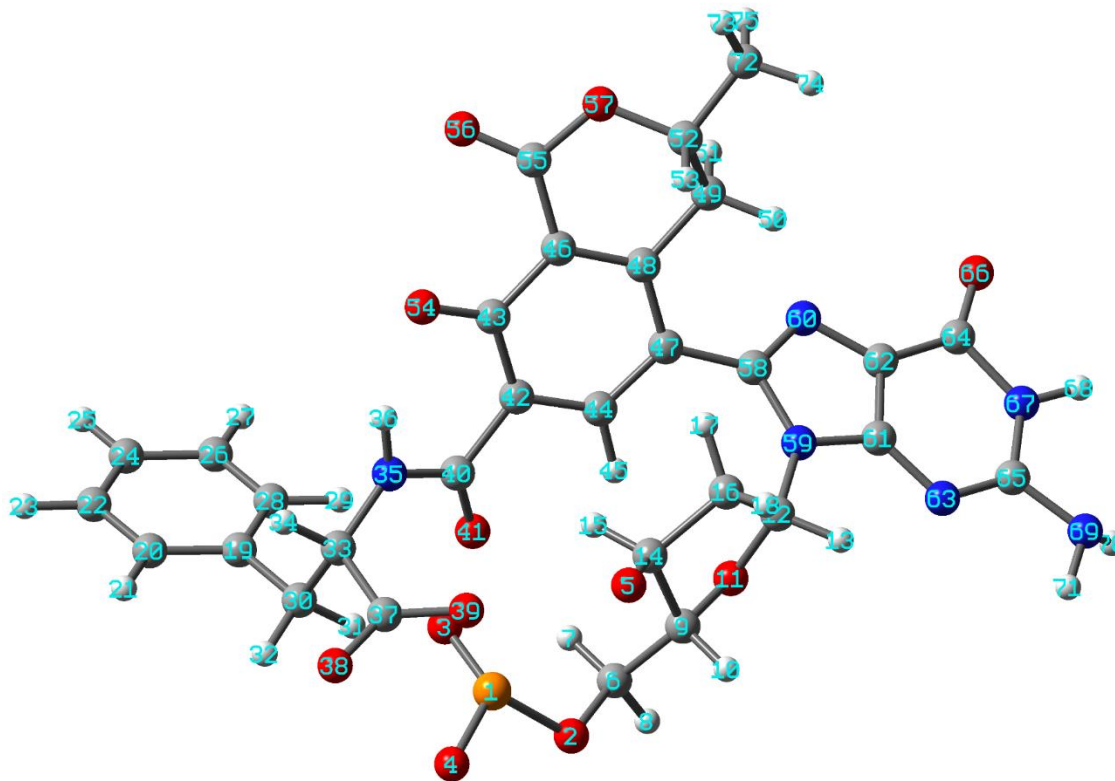

| Atom no. | Symbol | Atom type | Atomic charge |
|----------|--------|-----------|---------------|
| 1        | P      | P         | 1.165         |
| 2        | O      | OS        | -0.5277       |
| 3        | O      | O2        | -0.7663       |
| 4        | O      | O2        | -0.7663       |
| 5        | O      | OS        | -0.545        |
| 6        | C      | CI        | -0.0142       |
| 7        | H      | H1        | 0.0857        |
| 8        | H      | H1        | 0.0857        |
| 9        | C      | CT        | 0.1445        |
| 10       | H      | H1        | 0.1083        |

|    |   |    |         |
|----|---|----|---------|
| 11 | O | OS | -0.413  |
| 12 | C | CT | -0.0755 |
| 13 | H | H2 | 0.1369  |
| 14 | C | CT | 0.1425  |
| 15 | H | H1 | 0.0885  |
| 16 | C | CT | -0.0859 |
| 17 | H | HC | 0.0548  |
| 18 | H | HC | 0.0548  |
| 19 | C | CA | -0.0311 |
| 20 | C | CA | -0.1002 |
| 21 | H | HA | 0.1134  |
| 22 | C | CA | -0.2011 |
| 23 | H | HA | 0.1168  |
| 24 | C | CA | -0.1414 |
| 25 | H | HA | 0.1071  |
| 26 | C | CA | -0.169  |
| 27 | H | HA | 0.1256  |
| 28 | C | CA | -0.1089 |
| 29 | H | HA | 0.146   |
| 30 | C | CT | -0.1223 |
| 31 | H | HC | 0.0769  |
| 32 | H | HC | 0.0769  |
| 33 | C | CT | 0.0837  |
| 34 | H | H1 | 0.0269  |

|    |   |    |         |
|----|---|----|---------|
| 35 | N | N  | -0.1664 |
| 36 | H | H  | 0.2006  |
| 37 | C | C  | 0.7687  |
| 38 | O | O2 | -0.7572 |
| 39 | O | O2 | -0.7822 |
| 40 | C | C  | 0.2756  |
| 41 | O | O  | -0.5437 |
| 42 | C | CA | -0.0213 |
| 43 | C | C  | 0.329   |
| 44 | C | CA | -0.1793 |
| 45 | H | HA | 0.1654  |
| 46 | C | CA | -0.2033 |
| 47 | C | CA | -0.0352 |
| 48 | C | CA | -0.1103 |
| 49 | C | CT | -0.0097 |
| 50 | H | HC | 0.0437  |
| 51 | H | HC | 0.0437  |
| 52 | C | CT | 0.3777  |
| 53 | H | H1 | 0.001   |
| 54 | O | O  | -0.5876 |
| 55 | C | C  | 0.731   |
| 56 | O | O  | -0.5924 |
| 57 | O | OS | -0.5076 |
| 58 | C | CK | 0.2933  |

|    |   |    |         |
|----|---|----|---------|
| 59 | N | N* | 0.1072  |
| 60 | N | NB | -0.5975 |
| 61 | C | CB | 0.1587  |
| 62 | C | CB | 0.1077  |
| 63 | N | NC | -0.567  |
| 64 | C | C  | 0.5549  |
| 65 | C | CA | 0.715   |
| 66 | O | O  | -0.5956 |
| 67 | N | NA | -0.5721 |
| 68 | H | H  | 0.3543  |
| 69 | N | N2 | -0.9145 |
| 70 | H | H  | 0.377   |
| 71 | H | H  | 0.377   |
| 72 | C | CT | -0.331  |
| 73 | H | HC | 0.0734  |
| 74 | H | HC | 0.0734  |
| 75 | H | HC | 0.0734  |

**Table S11.** Average and standard deviation of the backbone RMSD obtained from MD simulations of OTB-dG adducted DNA in three ionization states.

| Position       | conformer                                | ionization state of OTA | average RMSD (Å) | standard deviation (Å) |
|----------------|------------------------------------------|-------------------------|------------------|------------------------|
| G <sup>1</sup> | major groove ( $\alpha$ )                | neutral                 | 2.050            | 0.449                  |
|                | major groove ( $\beta$ )                 |                         | 4.064            | 0.747                  |
|                | wedge ( $\alpha$ )                       |                         | 3.575            | 0.722                  |
|                | wedge ( $\beta$ )                        |                         | 3.751            | 0.743                  |
|                | base-displaced intercalated ( $\alpha$ ) |                         | 2.519            | 0.578                  |
|                | base-displaced intercalated ( $\beta$ )  |                         | 2.424            | 0.403                  |
|                | major groove ( $\alpha$ )                | monoanionic             | 3.740            | 0.657                  |
|                | major groove ( $\beta$ )                 |                         | 3.372            | 0.671                  |
|                | wedge ( $\alpha$ )                       |                         | 2.255            | 0.460                  |
|                | wedge ( $\beta$ )                        |                         | 2.352            | 0.407                  |
|                | base-displaced intercalated ( $\alpha$ ) |                         | 2.428            | 0.348                  |
|                | base-displaced intercalated ( $\beta$ )  |                         | 2.415            | 0.382                  |
|                | major groove ( $\alpha$ )                |                         | 3.266            | 0.650                  |

|       |                                          |             |       |       |
|-------|------------------------------------------|-------------|-------|-------|
|       | major groove ( $\beta$ )                 | dianionic   | 1.907 | 0.371 |
|       | wedge ( $\alpha$ )                       |             | 3.581 | 0.704 |
|       | wedge ( $\beta$ )                        |             | 3.882 | 0.671 |
|       | base-displaced intercalated ( $\alpha$ ) |             | 2.598 | 0.445 |
|       | base-displaced intercalated ( $\beta$ )  |             | 2.064 | 0.470 |
| $G^2$ | major groove ( $\alpha$ )                | neutral     | 3.769 | 0.716 |
|       | major groove ( $\beta$ )                 |             | 3.935 | 0.680 |
|       | wedge ( $\alpha$ )                       |             | 2.417 | 0.550 |
|       | wedge ( $\beta$ )                        |             | 2.820 | 0.718 |
|       | base-displaced intercalated ( $\alpha$ ) |             | 4.100 | 0.659 |
|       | base-displaced intercalated ( $\beta$ )  |             | 3.175 | 0.594 |
|       | major groove ( $\alpha$ )                | monoanionic | 2.888 | 0.787 |
|       | major groove ( $\beta$ )                 |             | 3.409 | 0.621 |
|       | wedge ( $\alpha$ )                       |             | 2.273 | 0.479 |
|       | wedge ( $\beta$ )                        |             | 2.332 | 0.417 |
|       | base-displaced intercalated ( $\alpha$ ) |             | 1.950 | 0.363 |
|       | base-displaced intercalated ( $\beta$ )  |             | 2.733 | 0.488 |
|       | major groove ( $\alpha$ )                | dianionic   | 3.162 | 0.692 |
|       | major groove ( $\beta$ )                 |             | 3.961 | 0.681 |
|       | wedge ( $\alpha$ )                       |             | 3.820 | 0.633 |
|       | wedge ( $\beta$ )                        |             | 2.261 | 0.449 |
|       | base-displaced intercalated ( $\alpha$ ) |             | 2.023 | 0.388 |
|       | base-displaced intercalated ( $\beta$ )  |             | 2.210 | 0.409 |

|                |                                          |             |       |       |
|----------------|------------------------------------------|-------------|-------|-------|
| G <sup>3</sup> | major groove ( $\alpha$ )                | neutral     | 4.069 | 0.818 |
|                | major groove ( $\beta$ )                 |             | 3.498 | 0.629 |
|                | wedge ( $\alpha$ )                       |             | 2.141 | 0.416 |
|                | wedge ( $\beta$ )                        |             | 2.025 | 0.374 |
|                | base-displaced intercalated ( $\alpha$ ) |             | 4.284 | 0.695 |
|                | base-displaced intercalated ( $\beta$ )  |             | 2.295 | 0.417 |
|                | major groove ( $\alpha$ )                | monoanionic | 3.613 | 0.747 |
|                | major groove ( $\beta$ )                 |             | 3.753 | 0.703 |
|                | wedge ( $\alpha$ )                       |             | 2.359 | 0.412 |
|                | wedge ( $\beta$ )                        |             | 1.897 | 0.393 |
|                | base-displaced intercalated ( $\alpha$ ) |             | 2.192 | 0.456 |
|                | base-displaced intercalated ( $\beta$ )  |             | 2.833 | 0.416 |
|                | major groove ( $\alpha$ )                | dianionic   | 3.794 | 0.682 |
|                | major groove ( $\beta$ )                 |             | 4.102 | 0.784 |
|                | wedge ( $\alpha$ )                       |             | 1.923 | 0.419 |
|                | wedge ( $\beta$ )                        |             | 2.004 | 0.393 |
|                | base-displaced intercalated ( $\alpha$ ) |             | 4.635 | 0.699 |
|                | base-displaced intercalated ( $\beta$ )  |             | 2.440 | 0.528 |

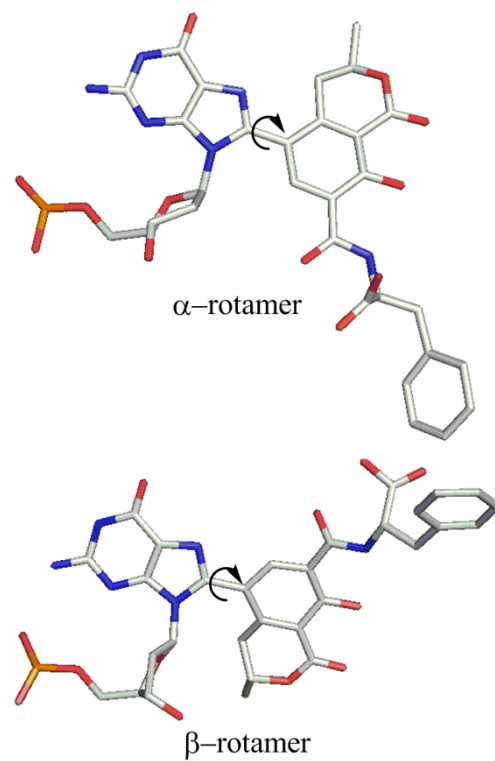

**Figure S1.** The  $\alpha$  and  $\beta$  rotamers of the OTB-dG lesion formed by rotating across the nucleobase-adduct linkage (indicated with round arrows).



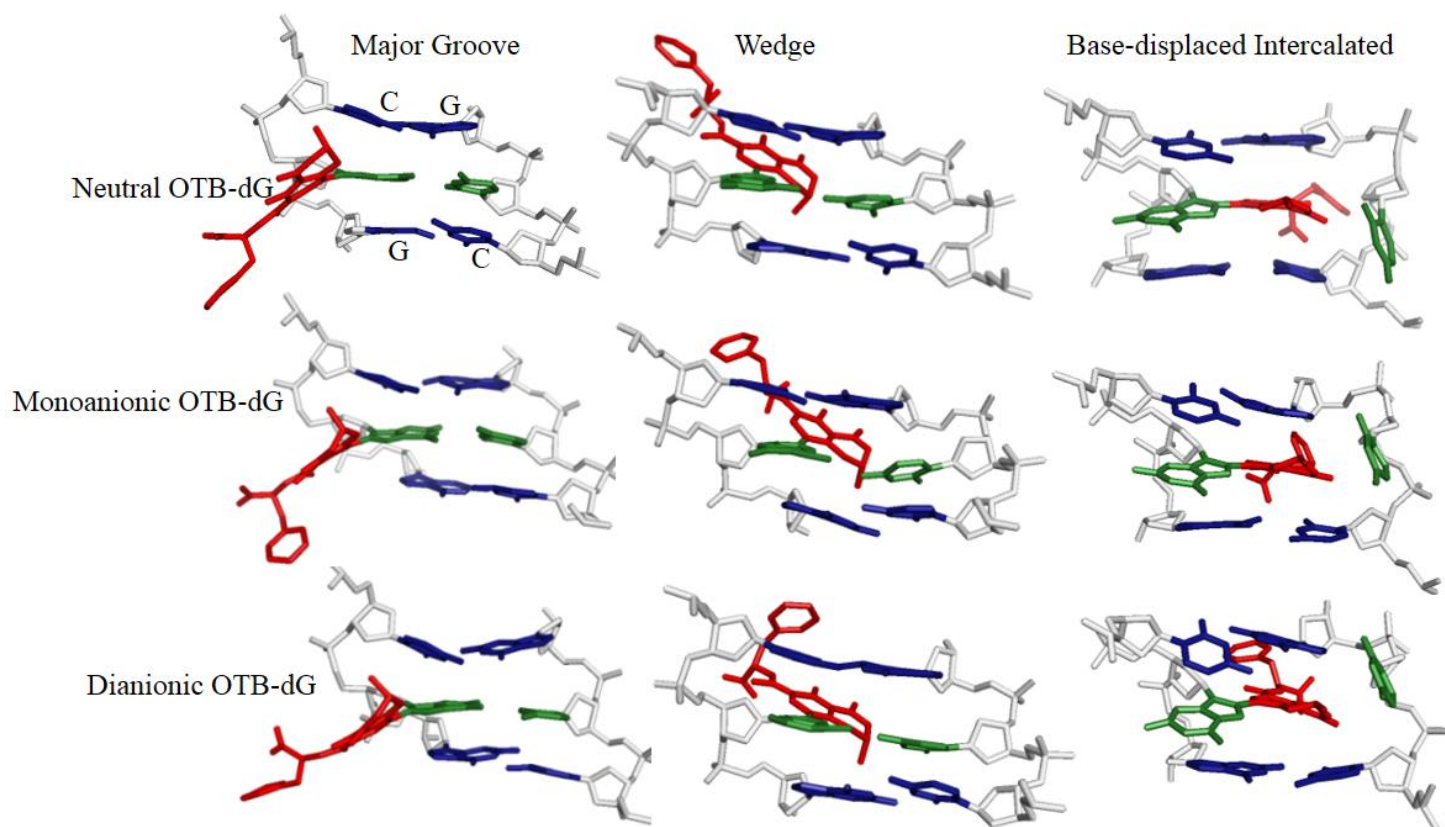

**Figure S2.** Representative structures of the OTB-dG  $\alpha$ -rotamer in various ionization states and the G<sup>1</sup> position in different conformations of the adducted *NarI* recognition sequence. Central trimers including the lesion (red) base pair (green) and the flanking base pairs (blue) viewed from the major groove side are shown (sugar-phosphate backbone in white). Hydrogen atoms were removed for clarity.

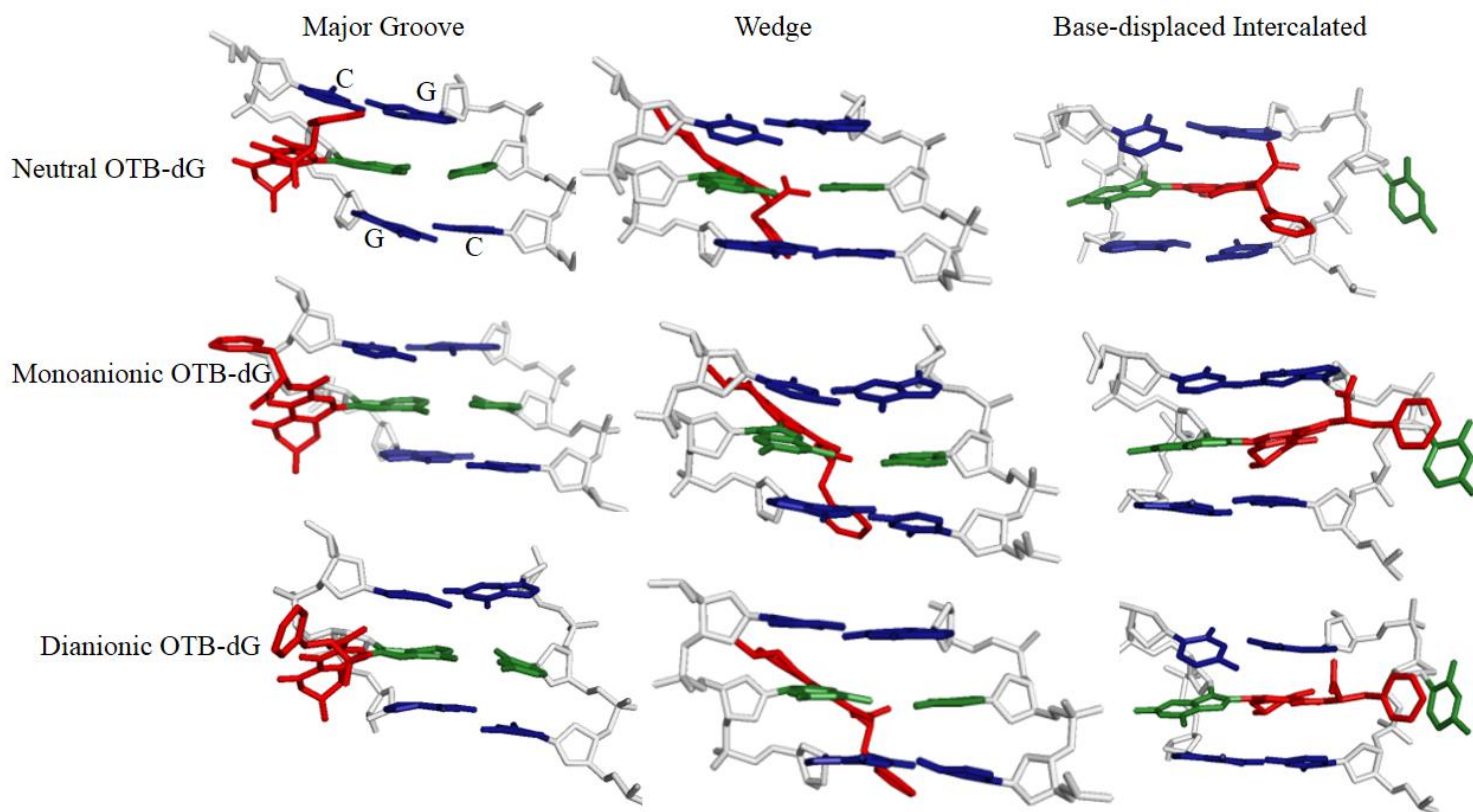

**Figure S3.** Representative structures of the OTB-dG  $\beta$ -rotamer in various ionization states and the  $G^1$  position in different conformations of the adducted *NarI* recognition sequence. Central trimers including the lesion (red) base pair (green) and the flanking base pairs (blue) viewed from the major groove side are shown (sugar-phosphate backbone in white). Hydrogen atoms were removed for clarity.

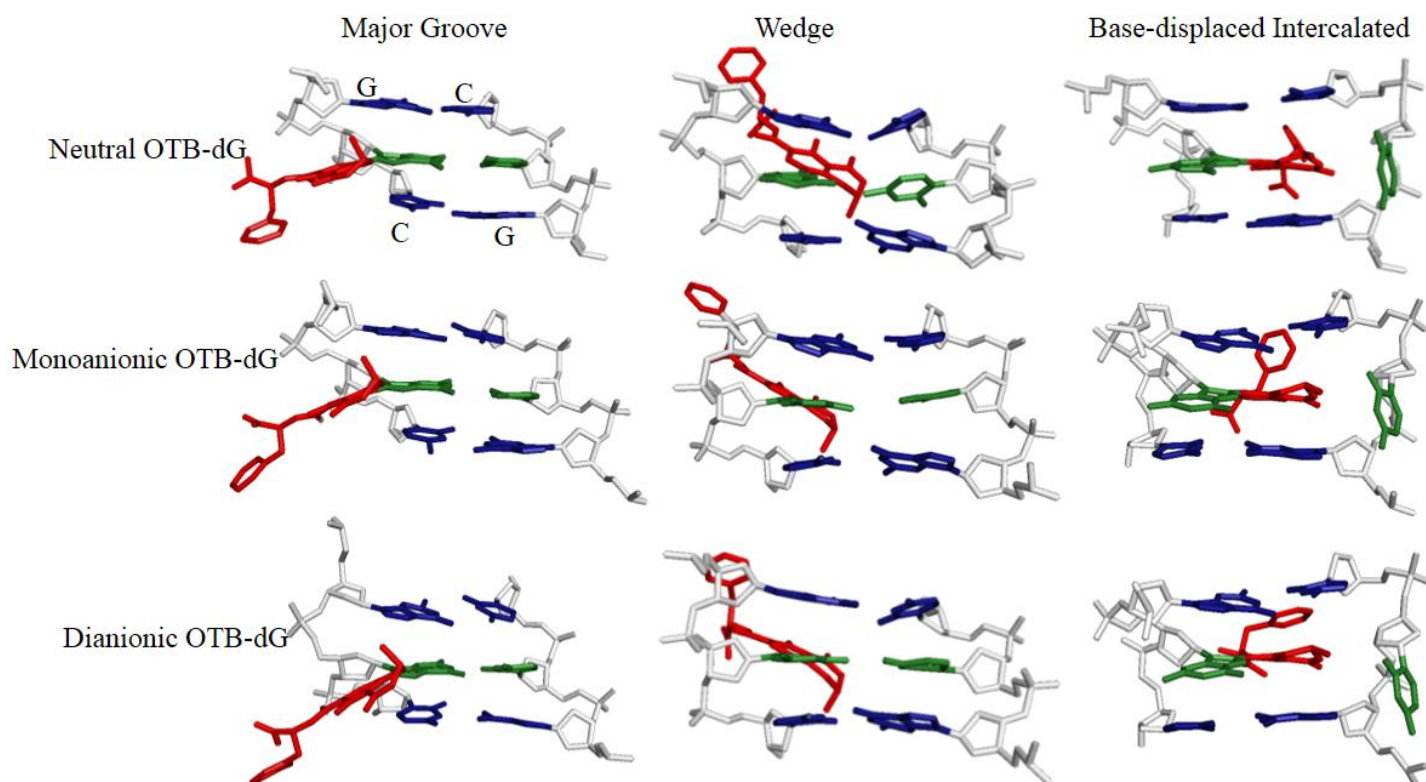

**Figure S4.** Representative structures of the OTB-dG  $\alpha$ -rotamer in various ionization states and the G<sup>2</sup> position in different conformations of the adducted *NarI* recognition sequence. Central trimers including the lesion (red) base pair (green) and the flanking base pairs (blue) viewed from the major groove side are shown (sugar-phosphate backbone in white). Hydrogen atoms were removed for clarity.

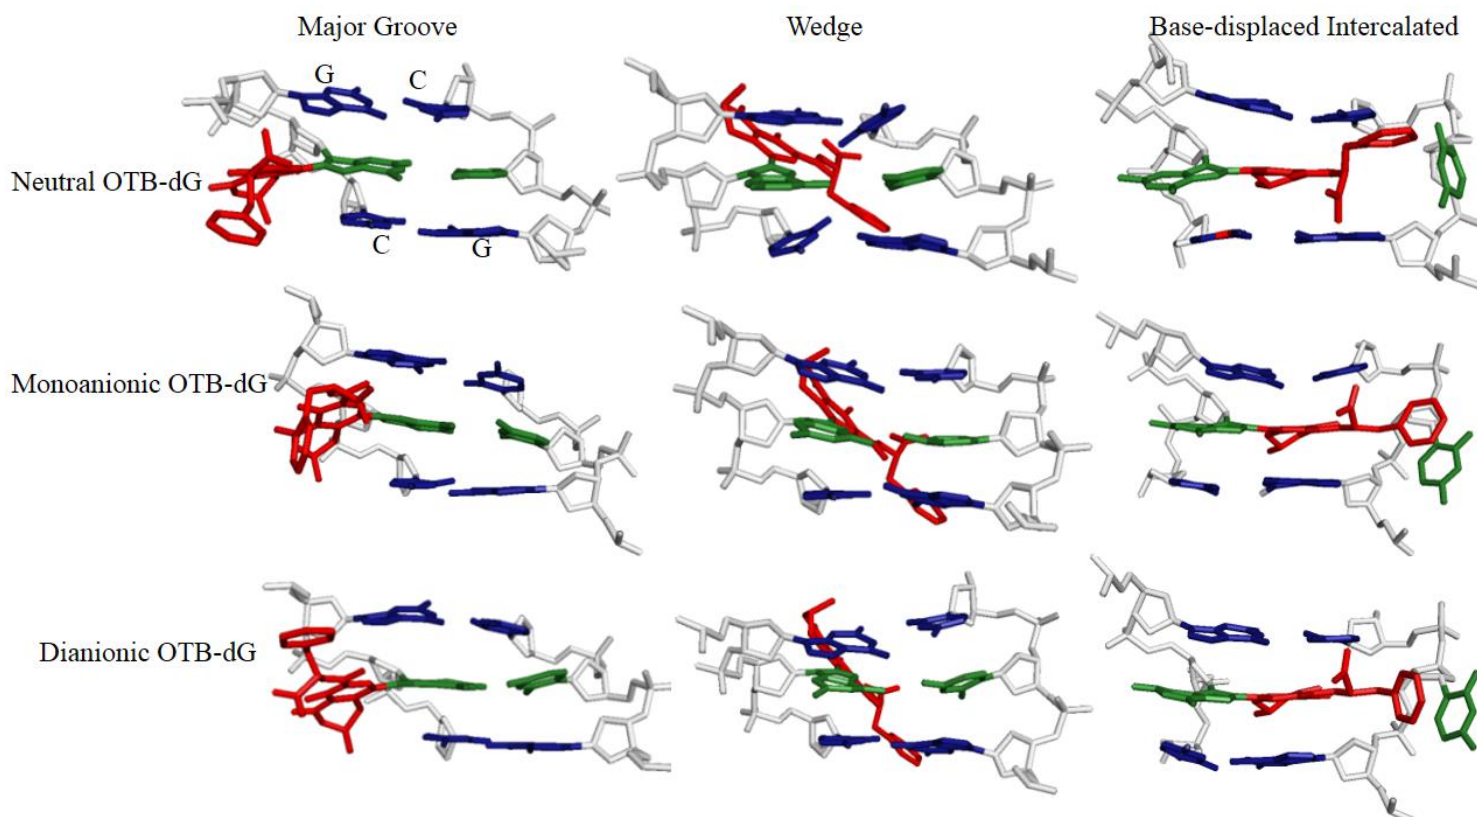

**Figure S5.** Representative structures of the OTB-dG  $\beta$ -rotamer in various ionization states and the  $G^2$  position in different conformations of the adducted *NarI* recognition sequence. Central trimers including the lesion (red) base pair (green) and the flanking base pairs (blue) viewed from the major groove side are shown (sugar-phosphate backbone in white). Hydrogen atoms were removed for clarity.

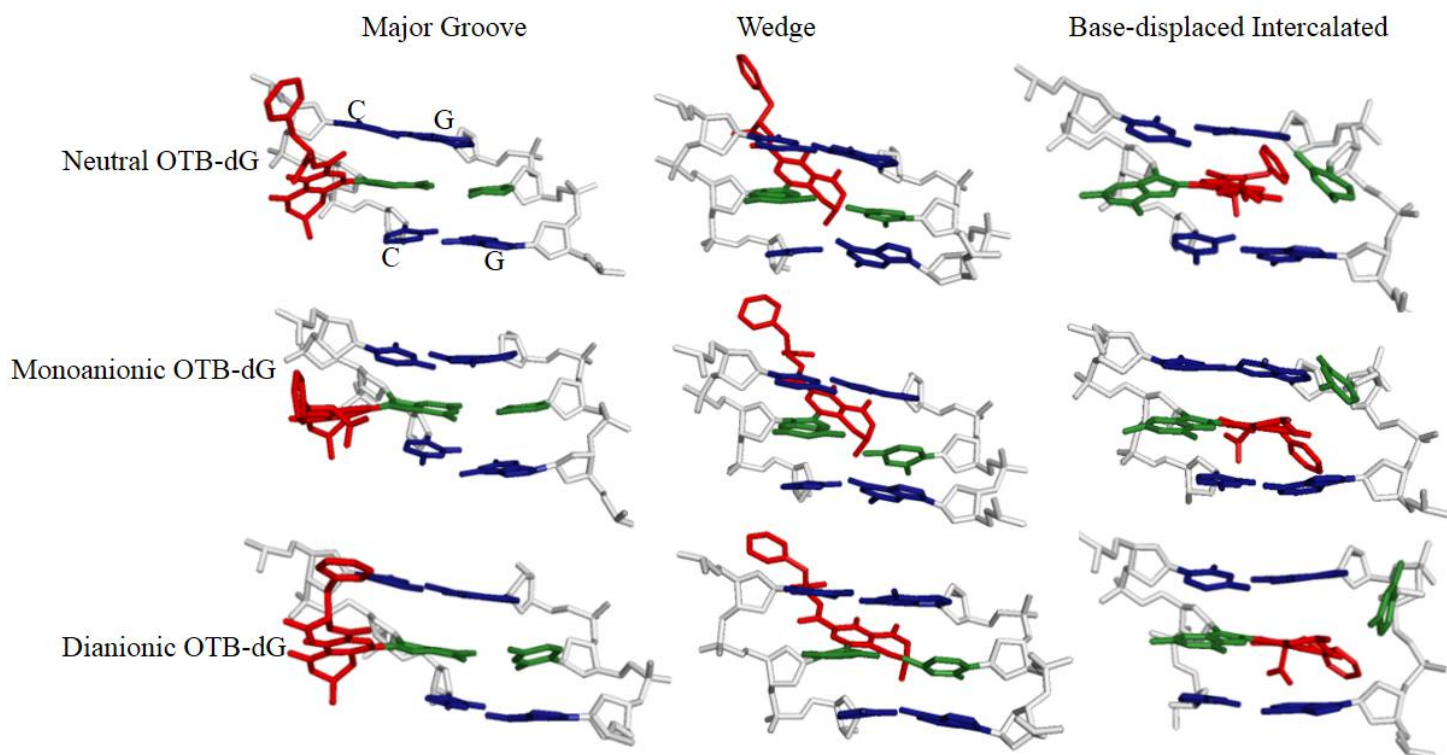

**Figure S6.** Representative structures of the OTB-dG  $\alpha$ -rotamer in various ionization states and the G<sup>3</sup> position in different conformations of the adducted *NarI* recognition sequence. Central trimers including the lesion (red) base pair (green) and the flanking base pairs (blue) viewed from the major groove side are shown (sugar-phosphate backbone in white). Hydrogen atoms were removed for clarity.



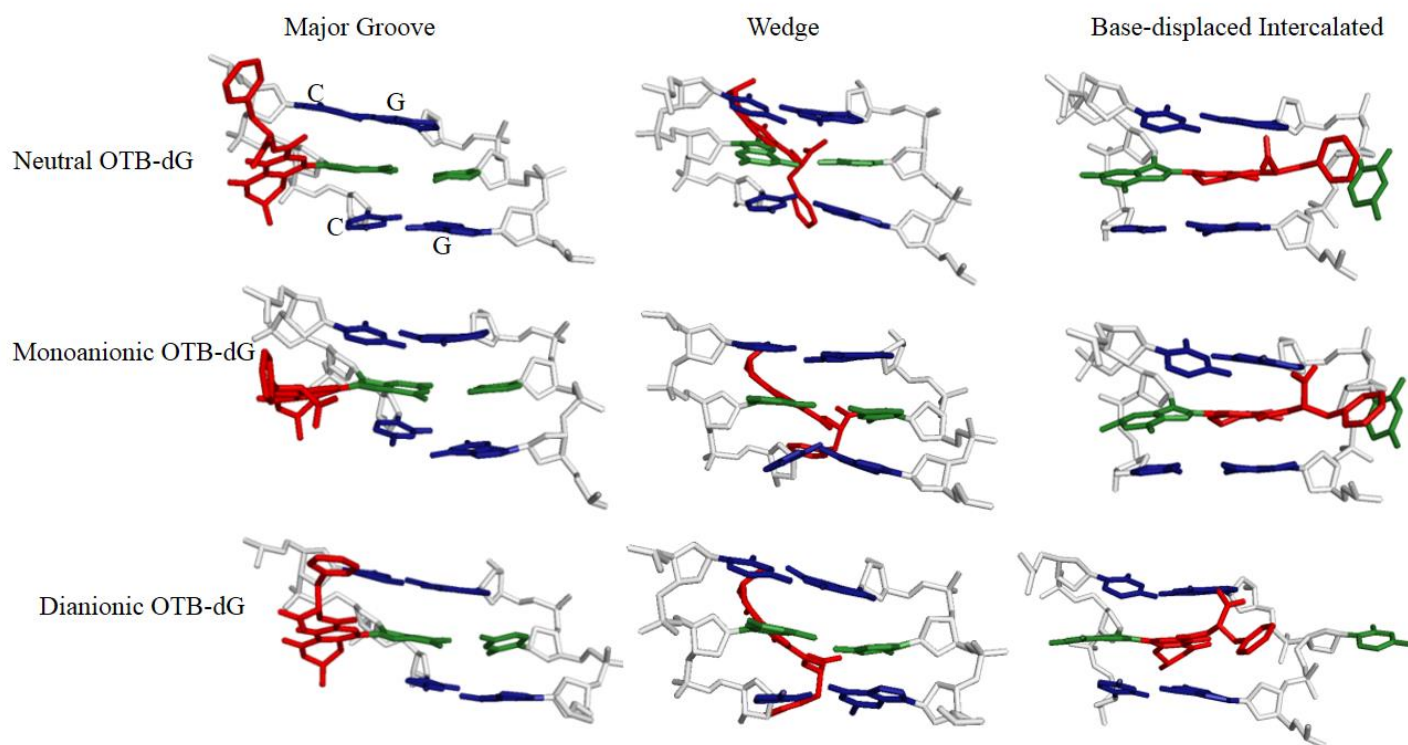

**Figure S7.** Representative structures of the OTB-dG  $\beta$ -rotamer in various ionization states and the G<sup>3</sup> position in different conformations of the adducted *NarI* recognition sequence. Central trimers including the lesion (red) base pair (green) and the flanking base pairs (blue) viewed from the major groove side are shown (sugar-phosphate backbone in white). Hydrogen atoms were removed for clarity.

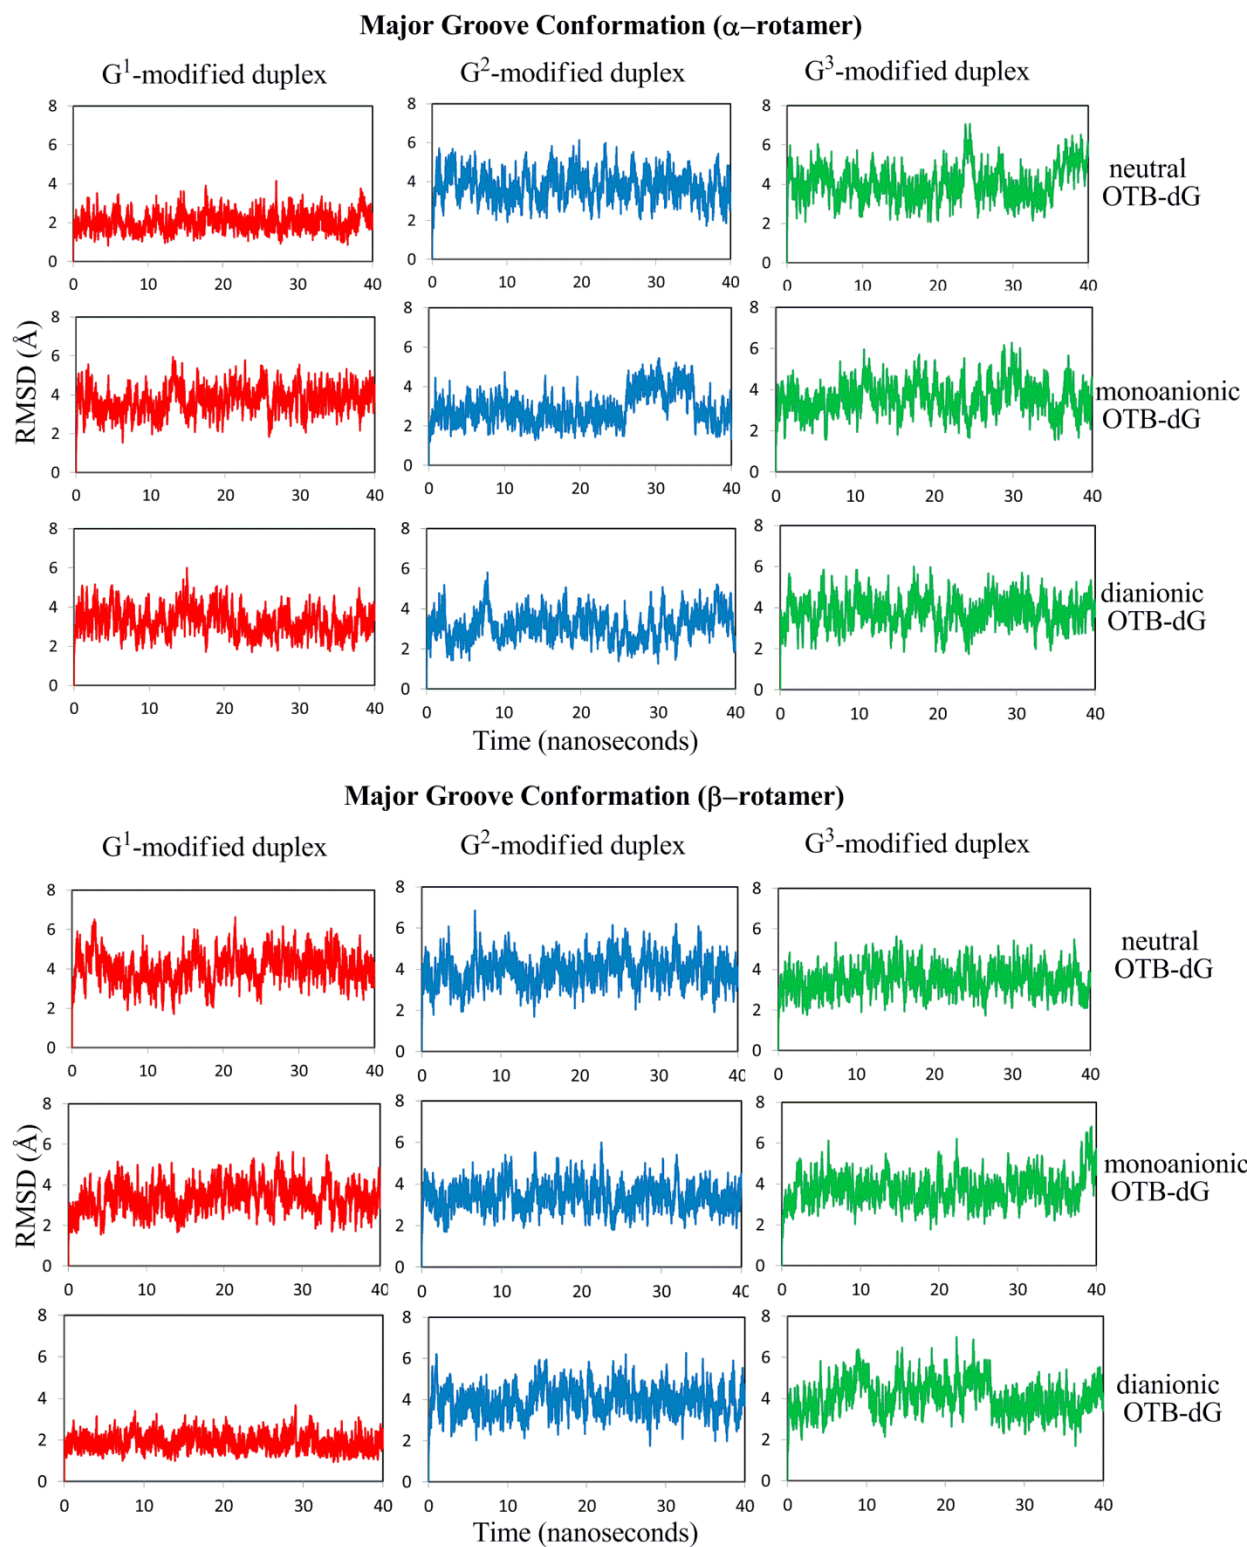

**Figure S8.** Backbone RMSD versus time for the major groove conformations of OTB-dG adducted DNA with the adduct in three positions and ionization states.

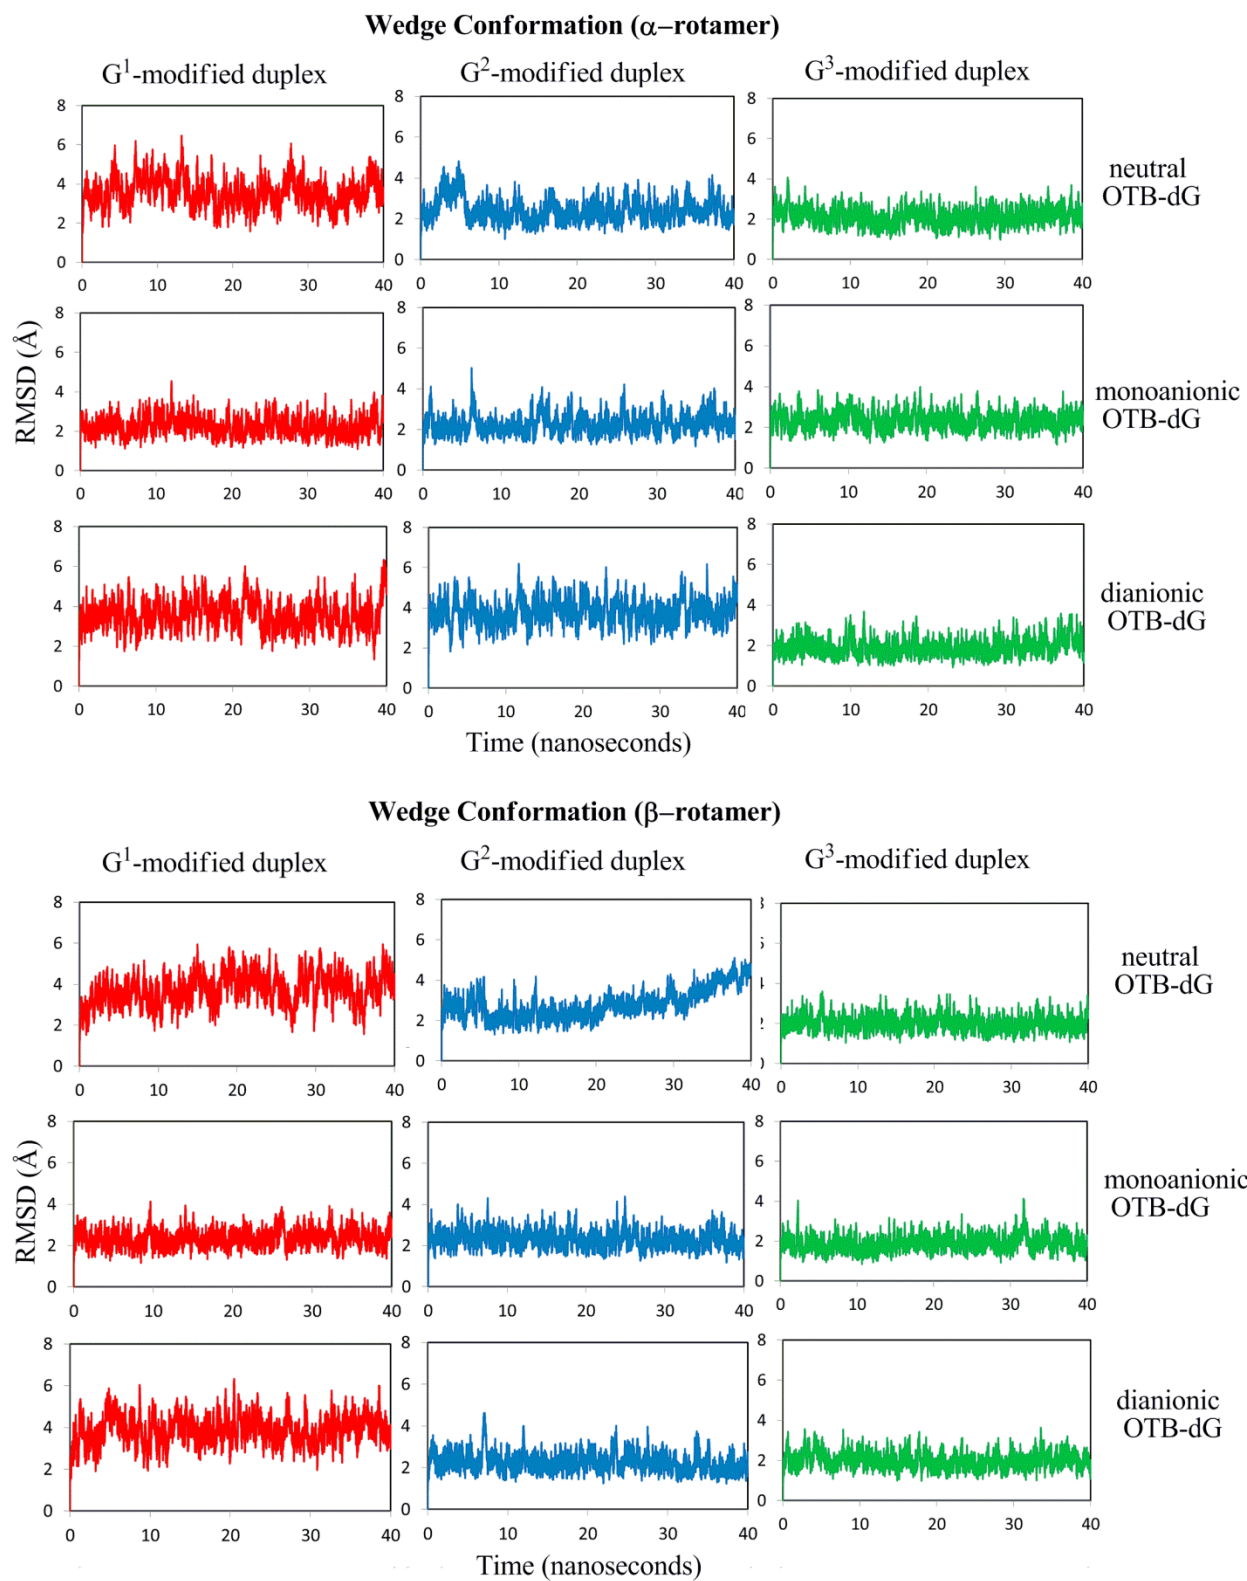

**Figure S9.** Backbone RMSD versus time for the wedge conformations of the OTB-dG adducted DNA with the adduct in three positions and ionization states.



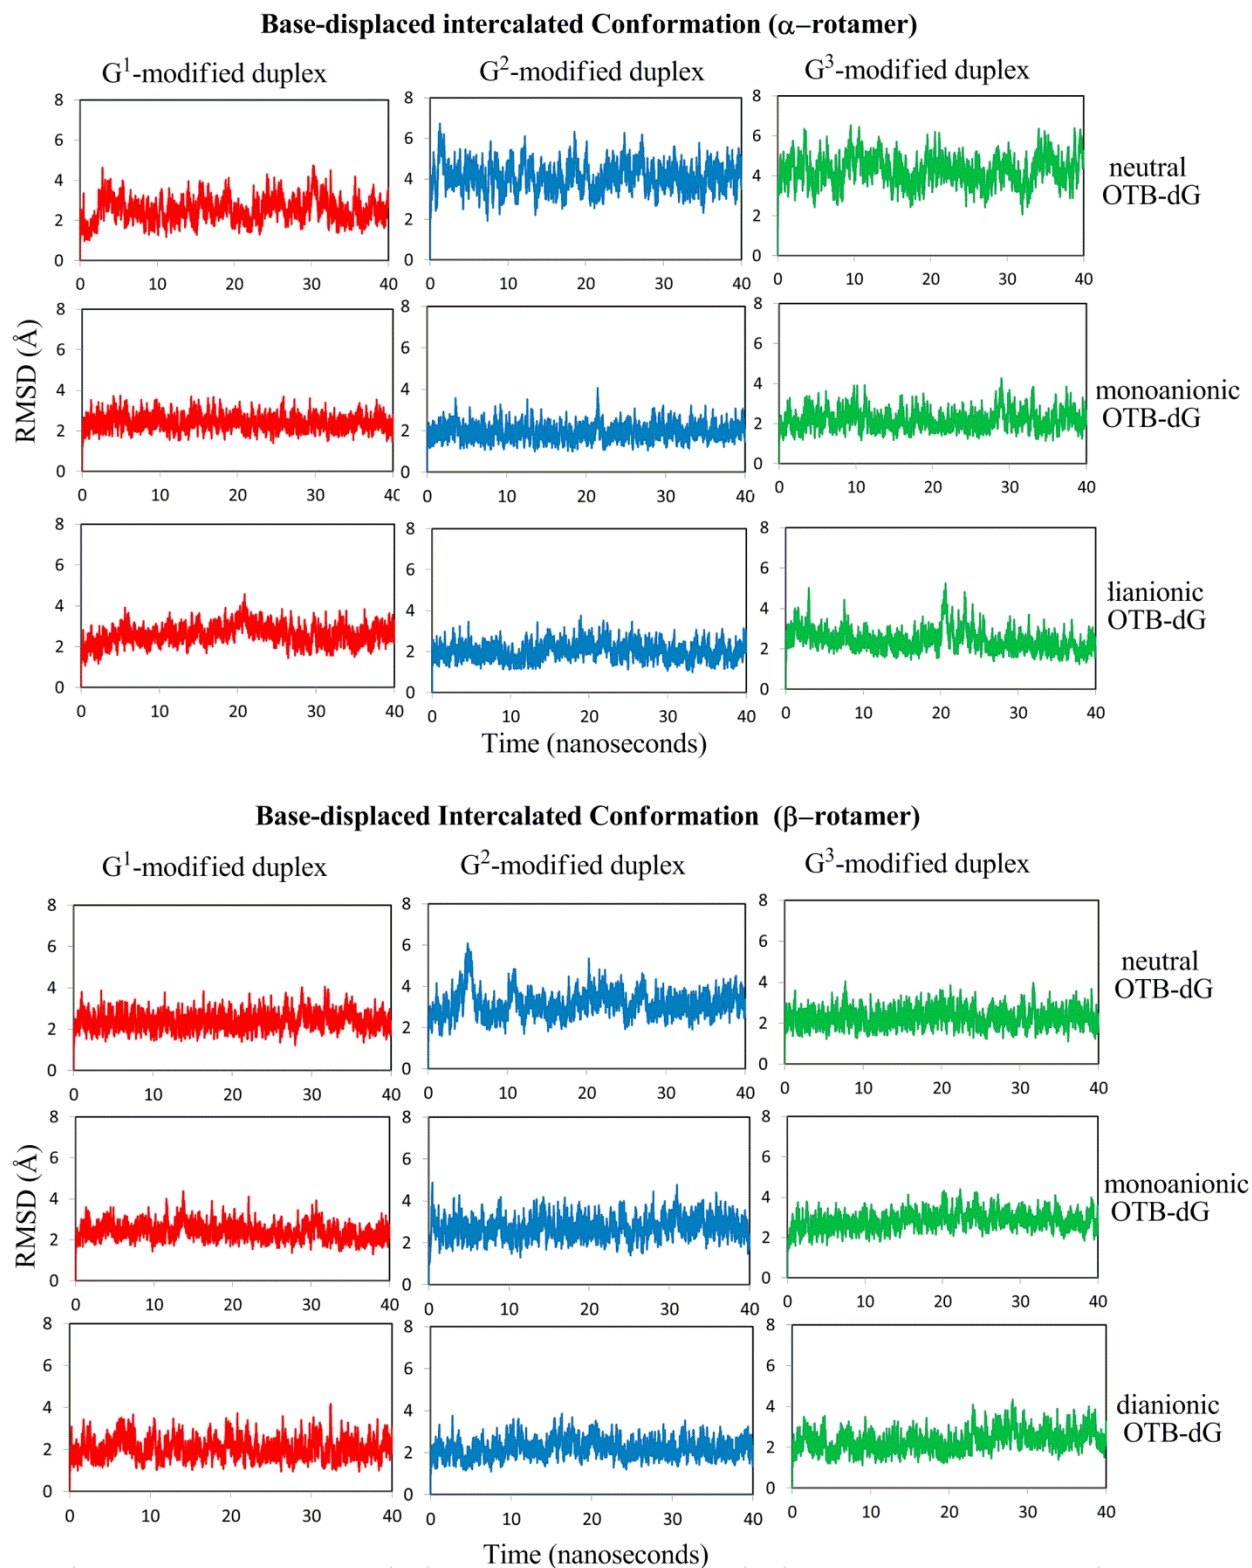

**Figure S10.** Backbone RMSD versus time for the base displaced intercalated conformations of the OTB-dG adducted DNA with the adduct in three positions and ionization states.

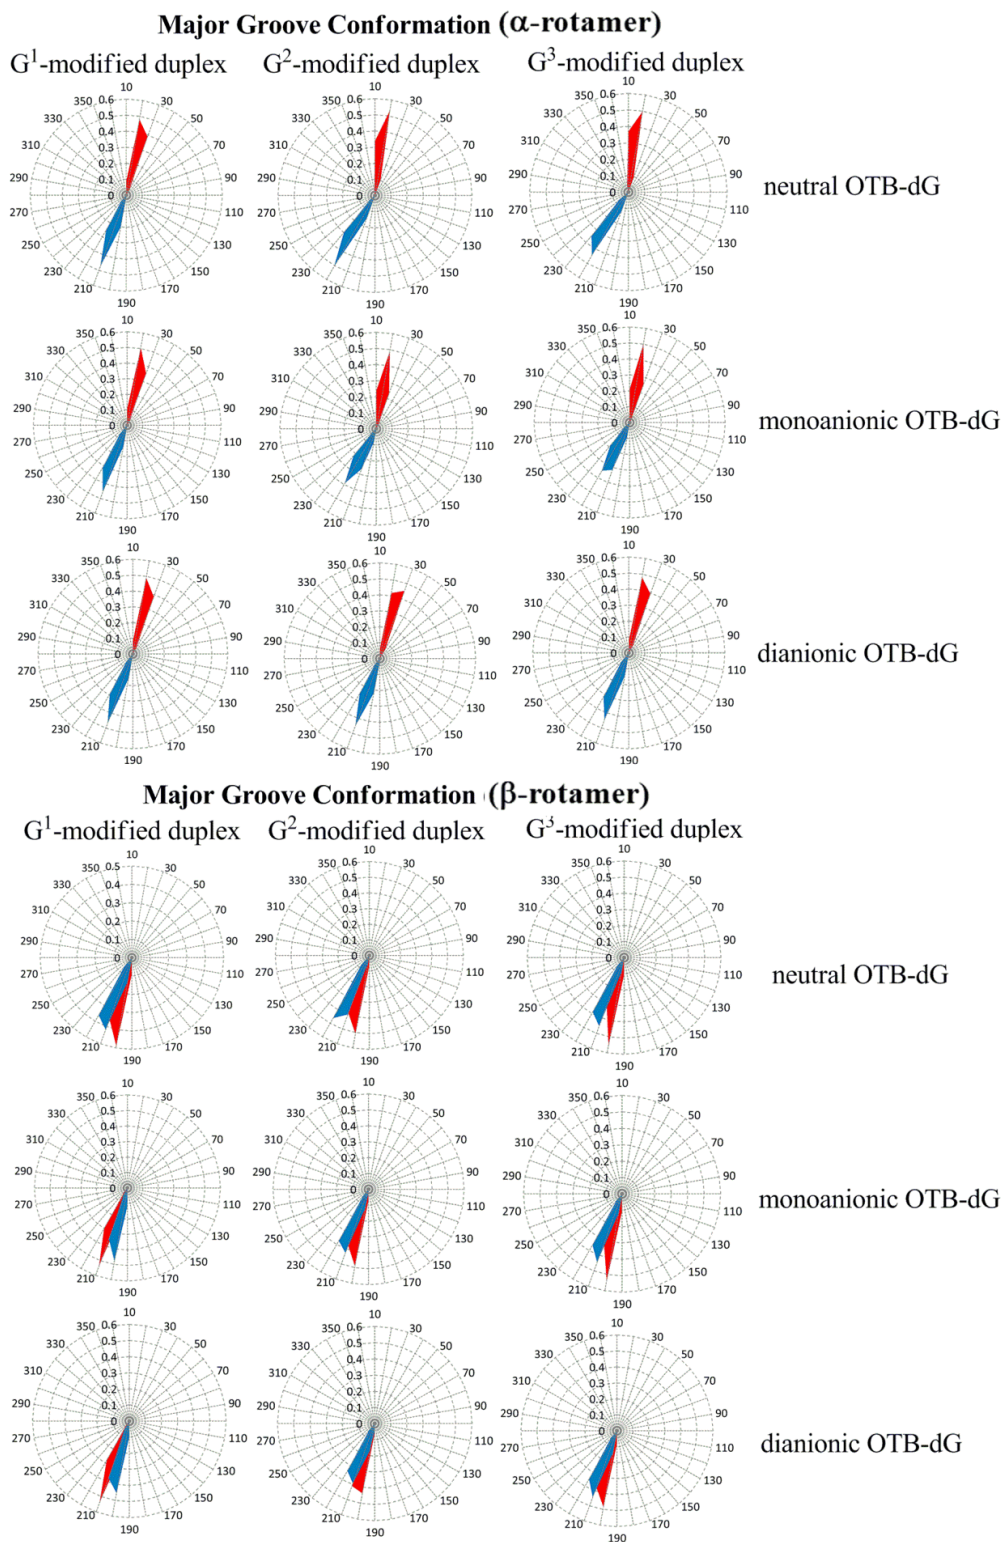

**Figure S11.** Radar plots for the probability distribution of the  $\chi$  (blue) and  $\theta$  (red) torsion angles for the major-groove conformations of OTB-dG adducted DNA with the lesion in two rotamers, three positions and three ionization states.

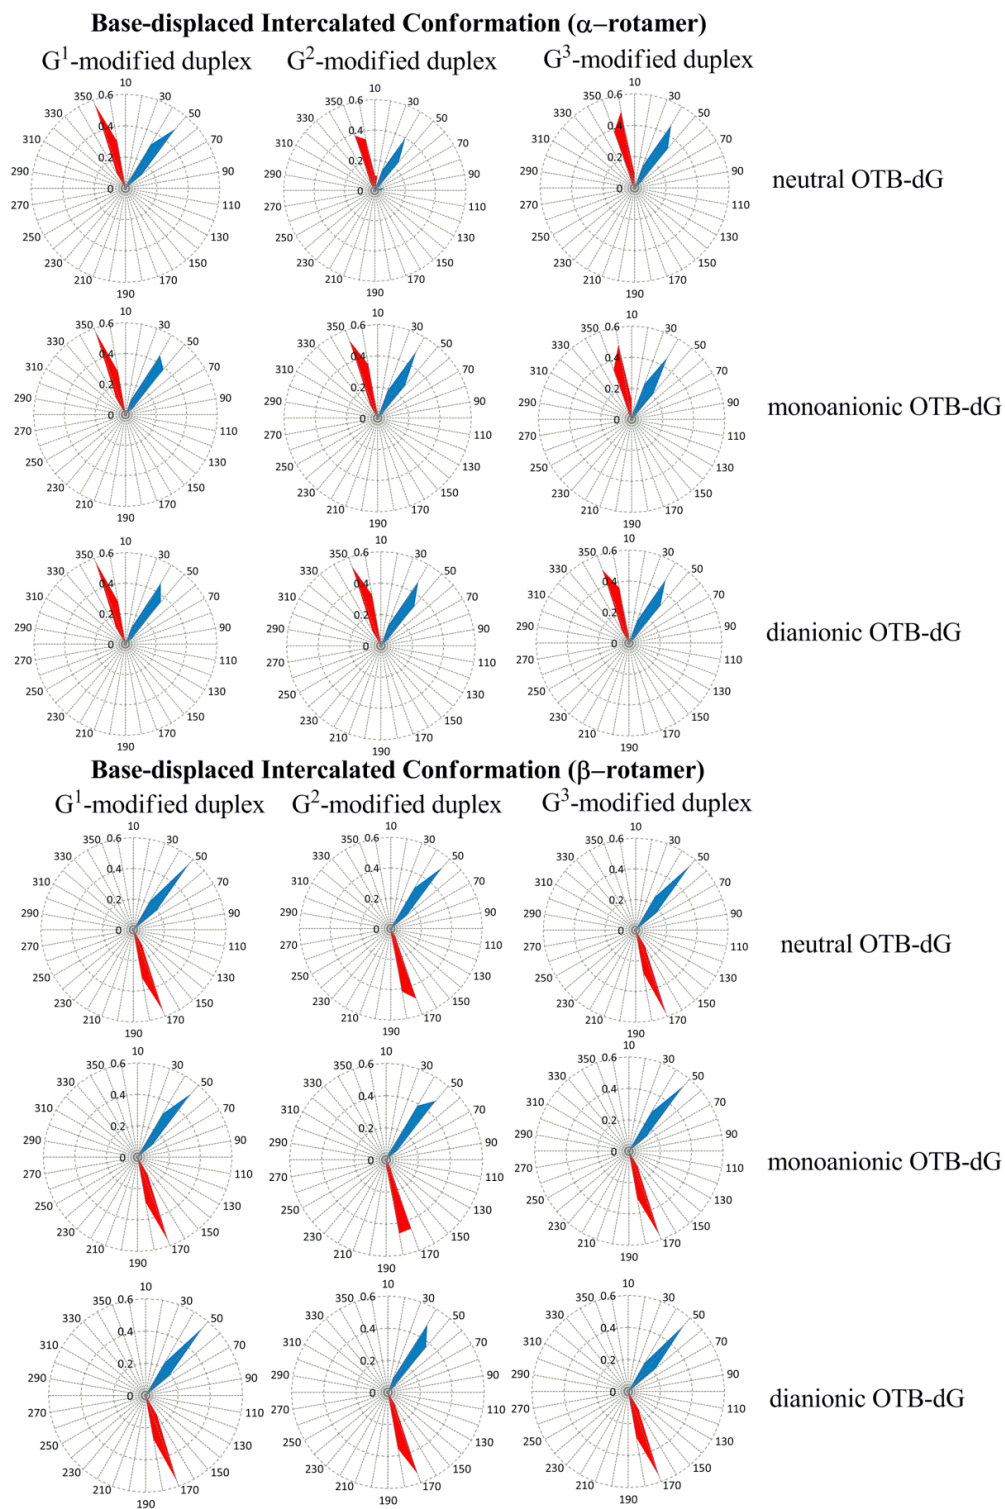

**Figure S12.** Radar plots for the probability distribution of the  $\chi$  (blue) and  $\theta$  (red) torsion angles for the base-displaced intercalated conformations of OTB-dG adducted DNA with the lesion in two rotamers, three positions and three ionization states.



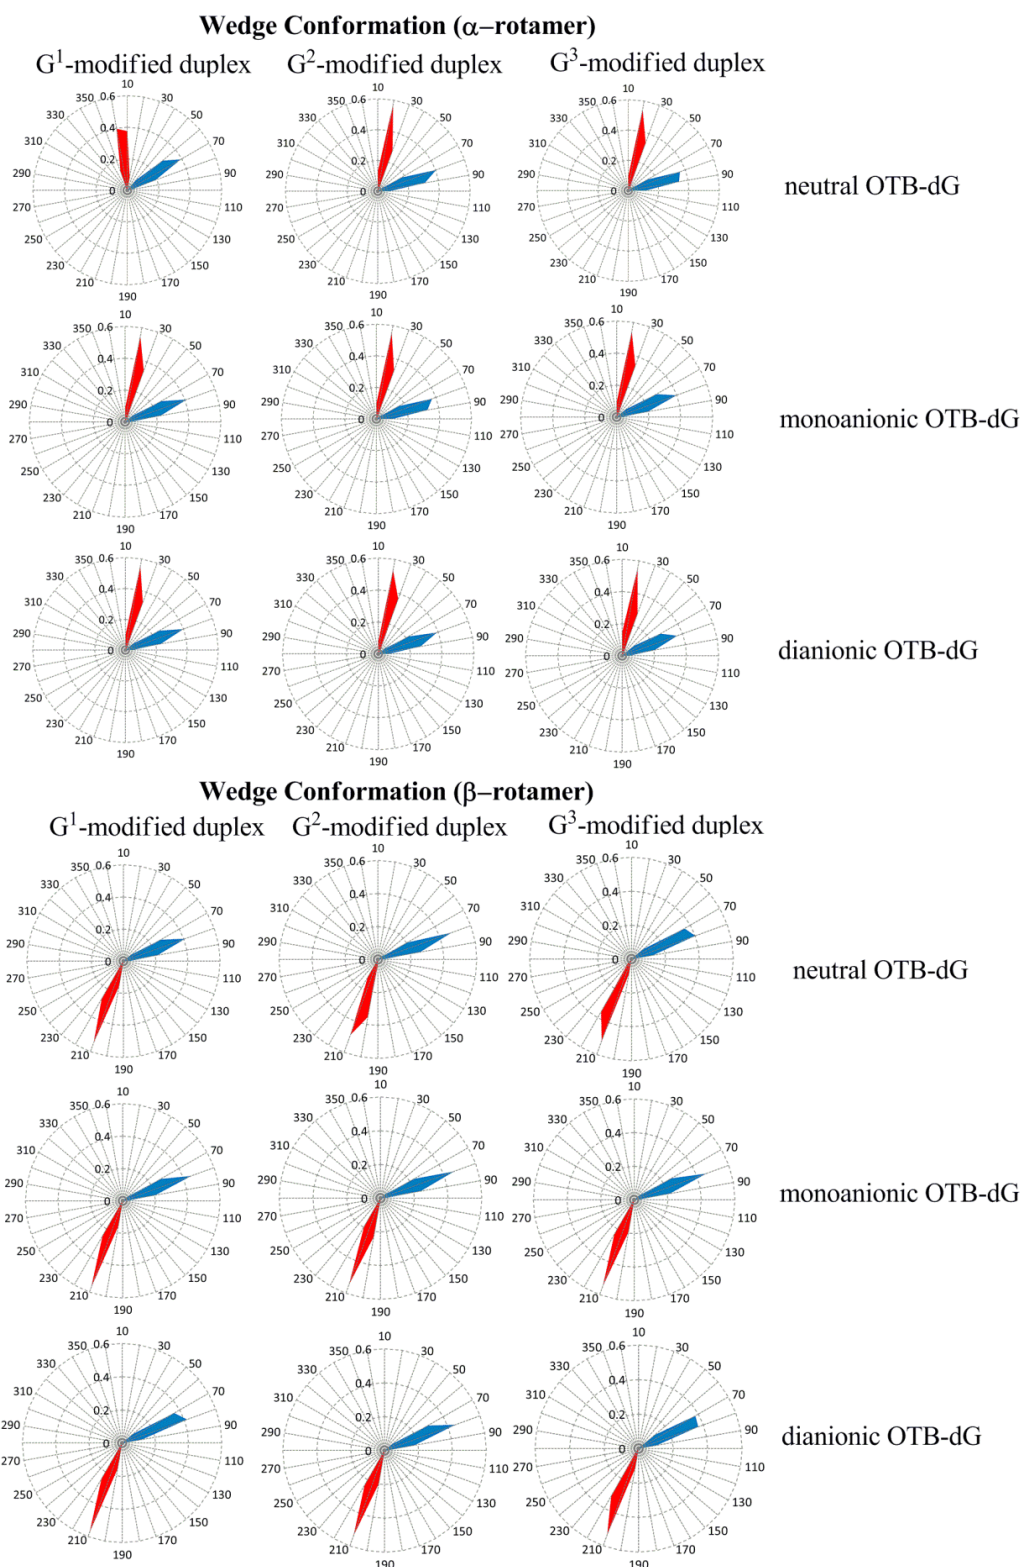

**Figure S13.** Radar plots for the probability distribution of the  $\chi$  (blue) and  $\theta$  (red) torsion angles for the wedge conformations of OTB-dG adducted DNA with the lesion in two rotamers, three positions and three ionization states.

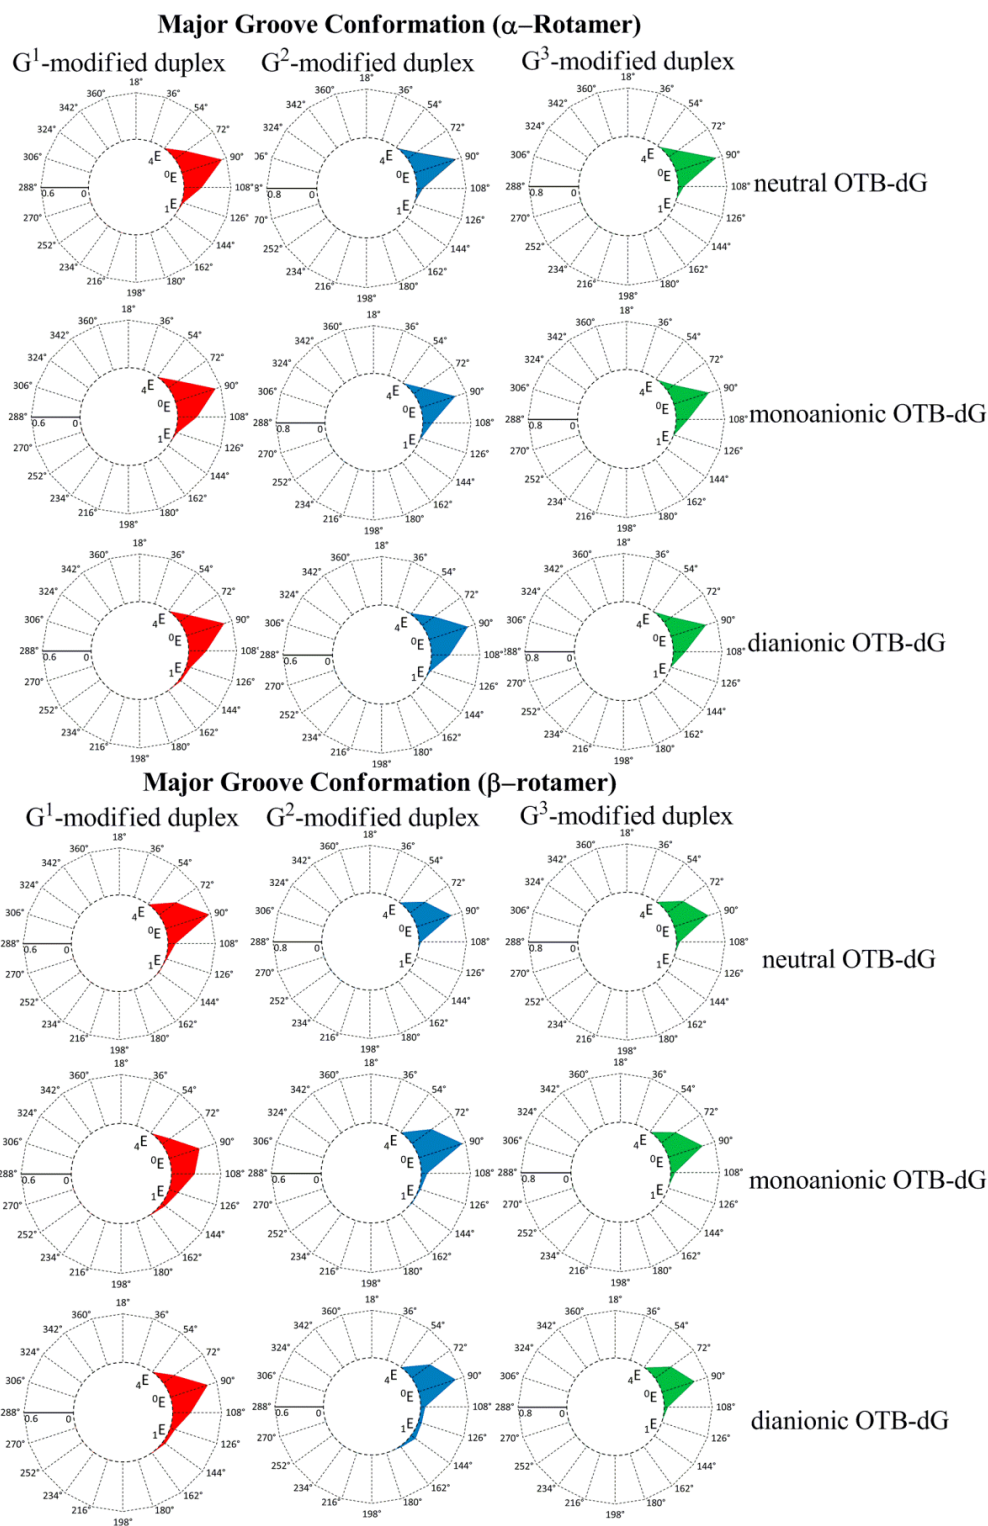

**Figure S14.** Pseudorotation plots showing the probability distribution of the sugar pucker for the major groove conformations of OTB-dG adducted DNA with the lesion in two rotamers, three positions and three ionization states.

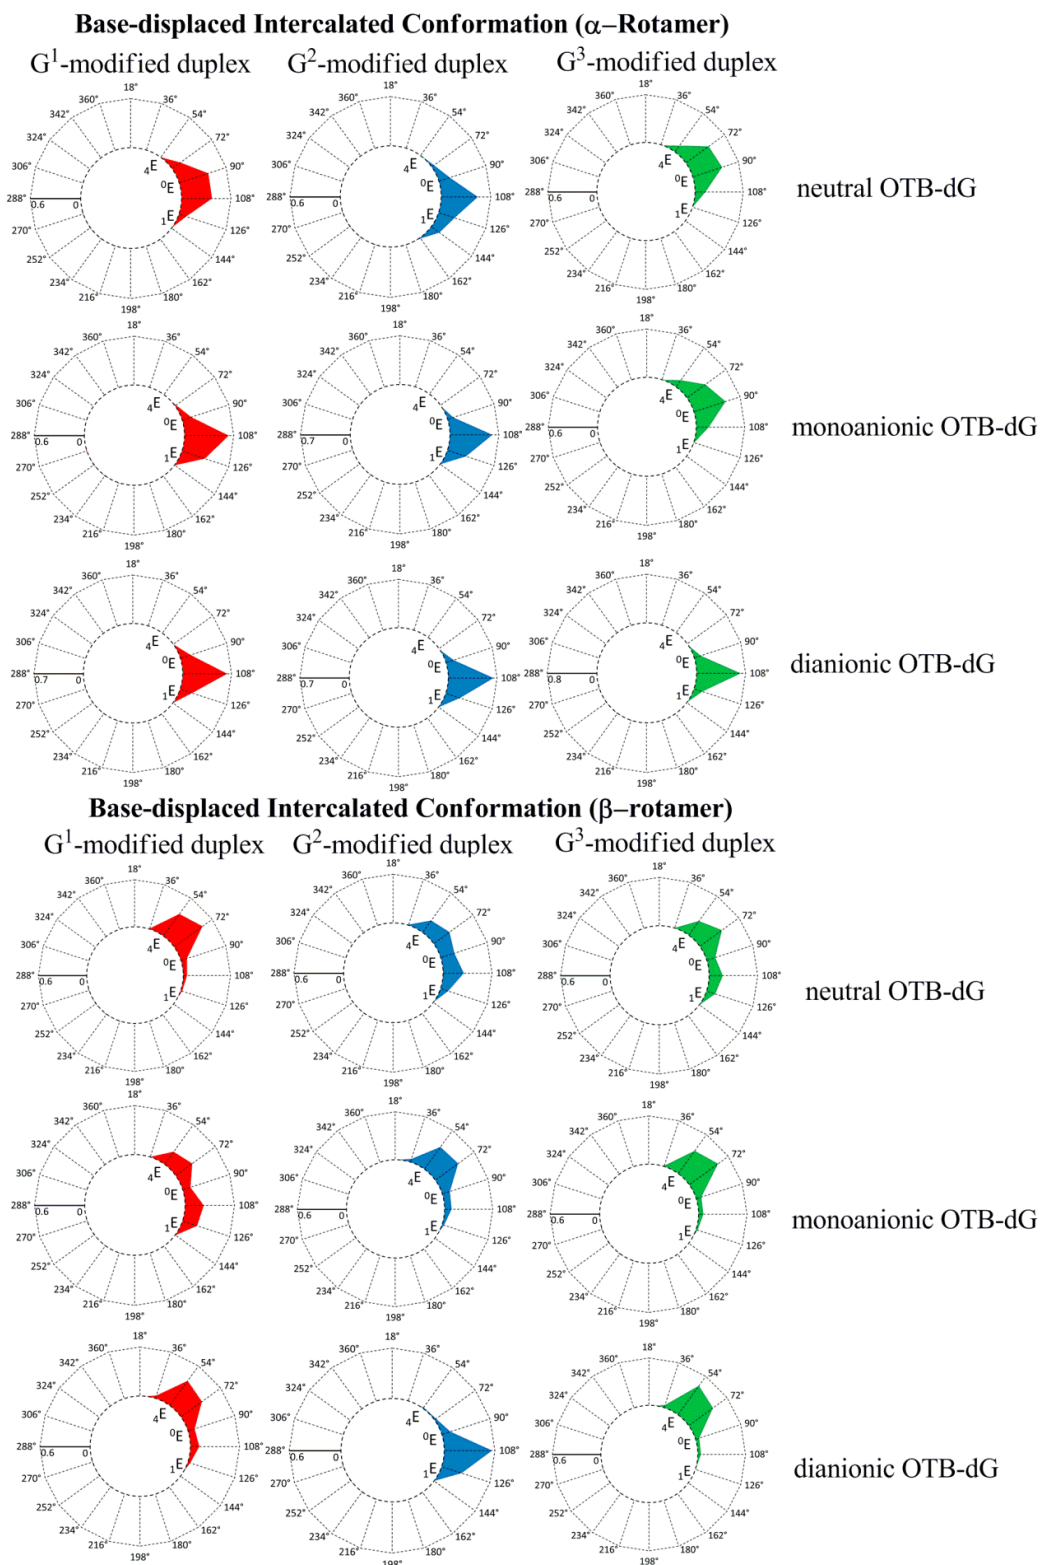

**Figure S15.** Pseudorotation plots showing the probability distribution of the sugar pucker for the base-displaced intercalated conformations of OTB-dG adducted DNA with the lesion in two rotamers, three positions and three ionization states.

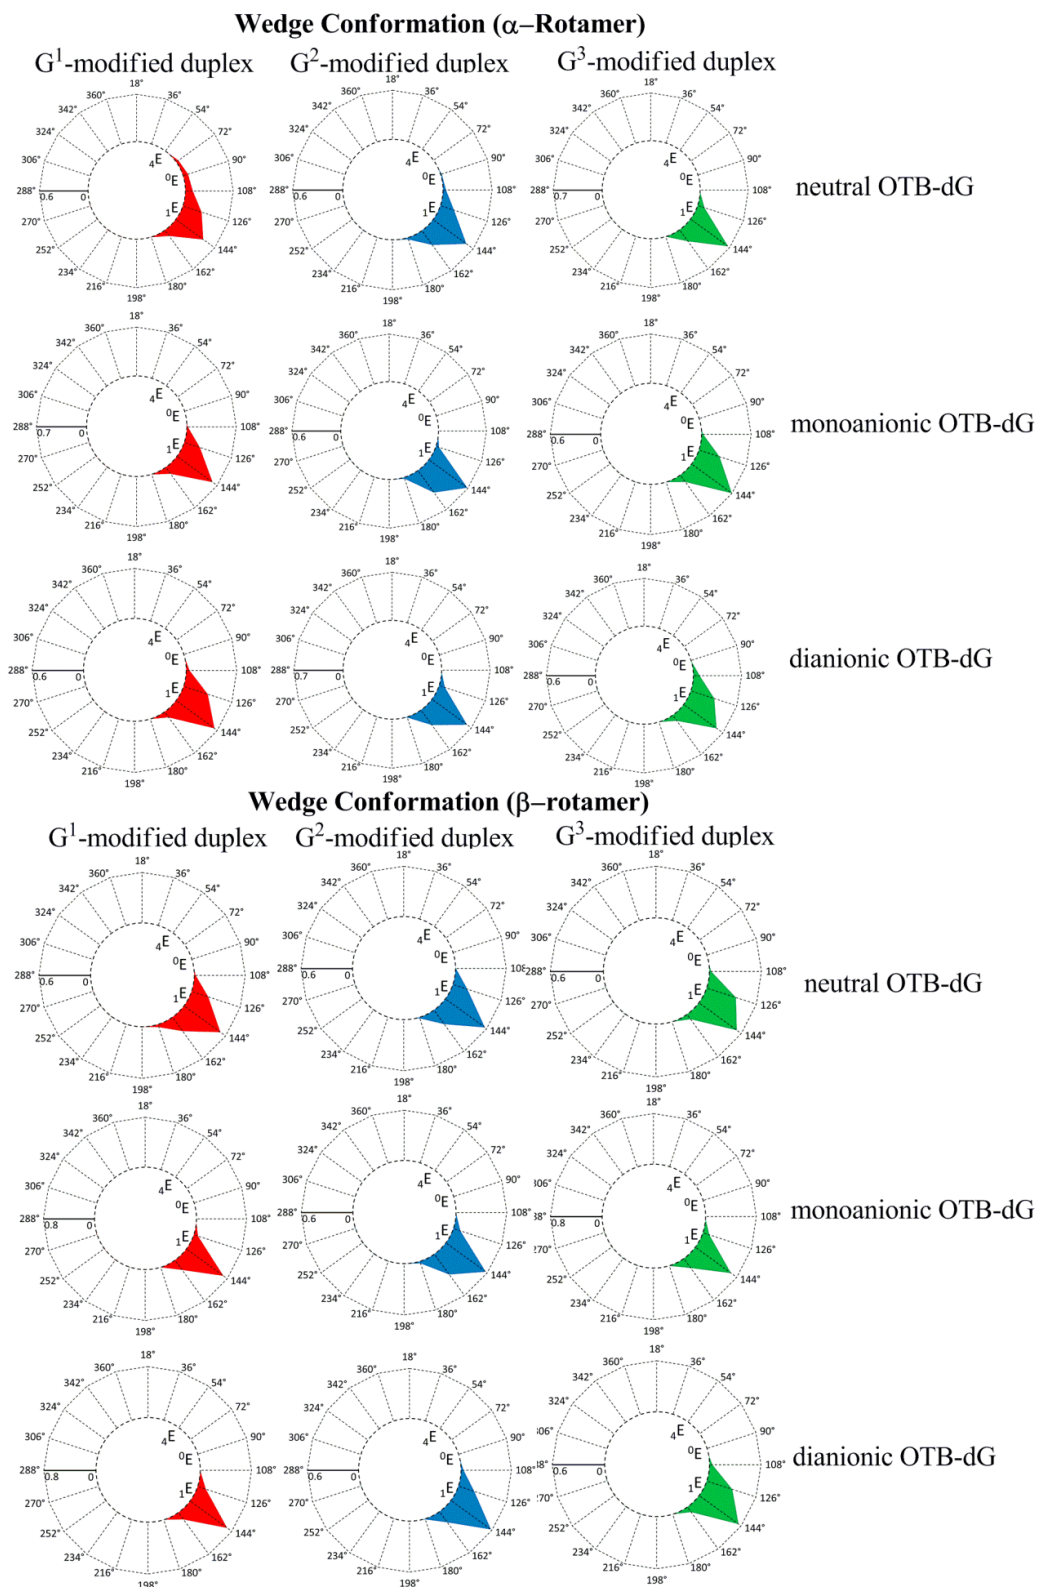

**Figure S16.** Pseudorotation plots showing the probability distribution of sugar pucker for the wedge conformations of OTB-dG adducted DNA with the lesion in two rotamers, three positions and three ionization states.

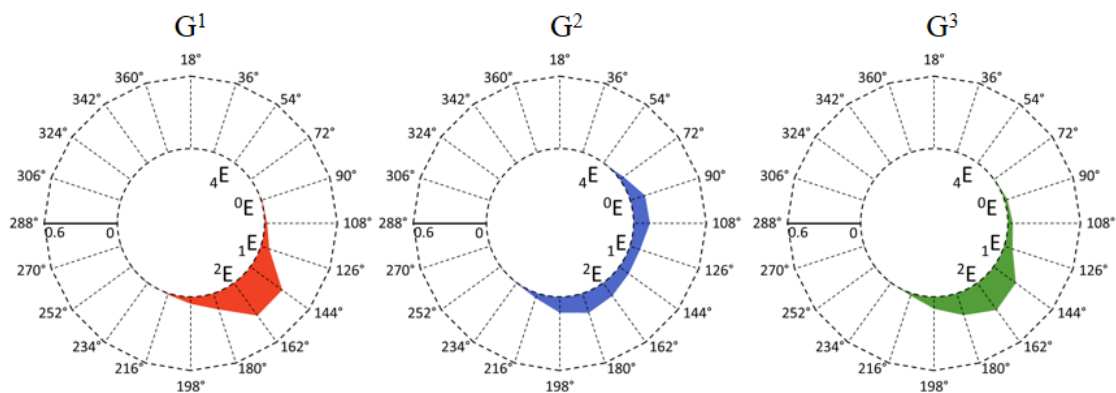

**Figure S17.** Pseudorotation plots showing the probability distribution of the sugar pucker at the  $G^1$ ,  $G^2$  and  $G^3$  positions in the natural *NarI* helix.



## References

1. Case, D.A., Darden, T.A., T.E. Cheatham, I., Simmerling, C.L., Wang, J., Duke, R.E., Luo, R., Crowley, M., R.C.Walker, Zhang, W., Merz, K.M., B.Wang, Hayik, S., Roitberg, A., Seabra, G., Kolossváry, I., K.F.Wong, Paesani, F., Vanicek, J., Wu, X., Brozell, S.R., Steinbrecher, T., Gohlke, H., Yang, L., Tan, C., Mongan, J., Hornak, V., Cui, G., Mathews, D.H., Seetin, M.G., Sagui, C., Babin, V. and Kollman, P.A., *Amber 11*. 2010, University of California, San Francisco, CA.
2. Wang, J., Wolf, R.M., Caldwell, J.W., Kollman, P.A. and Case, D.A. (2004) Development and testing of a general AMBER force field. *J. Comput. Chem.* **25**, 1157–1174.
3. Dupradeau, F.-Y., Pigache, A., Zaffran, T., Savineau, C., Lelong, R., Grivel, N., Lelong, D., Rosanski, W. and Cieplak, P. (2010) The R.E.D. Tools: Advances in RESP and ESP charge derivation and force field library building. *Phys. Chem. Chem. Phys.* **12**, 7821-7839.
4. Sharma, P., Manderville, R.A. and Wetmore, S.D. (2013) Modeling the conformational preference of the carbon-bonded covalent adduct formed upon exposure of 2'-deoxyguanosine to ochratoxin a. *Chem. Res. Toxicol.* **26**, 803-816.
5. Wang, J., Wang, W., Kollman, P.A. and Case, D.A. (2006) Automatic atom type and bond type perception in molecular mechanical calculations. *J. Mol. Graph. Model.* **25**, 247–260.
6. Case, D.A., Darden, T.A., T.E. Cheatham, I., Simmerling, C.L., Wang, J., Duke, R.E., Luo, R., Walker, R.C., Zhang, W., Merz, K.M., Roberts, B., Hayik, S., Roitberg, A., Seabra, G., Swails, J., Goetz, A.W., Kolossváry, I., Wong, K.F., Paesani, F., Vanicek, J., Wolf, R.M., Liu, J., Wu, X., Brozell, S.R., Steinbrecher, T., Gohlke, H., Cai, Q., Ye, X., Wang, J., Hsieh, M.-J., Cui, G., Roe, D.R., Mathews, D.H., Seetin, M.G., Salomon-Ferrer, R., Sagui, C., Babin, V., Luchko, T., Gusarov, S., Kovalenko, A. and Kollman, P.A., *Amber 12*. 2012, University of California, San Francisco, CA.
7. Jorgensen, W.L., Chandrasekhar, J., Madura, J.D., Impey, R.W. and Klein, M.L. (1983) Comparison of simple potential functions for simulating liquid water. *J. Chem. Phys.* **79**, 926–935.
8. Miller, B.R., McGee, T.D., Swails, J.M., Homeyer, N., Gohlke, H. and Roitberg, A.E. (2012) MMPBSA.Py: An efficient program for end-state free energy calculations. *J. Chem. Theory Comput.* **8**, 3314–3321.
